# Supplementary material for: Comparison of neonatal outcomes of small for gestational age and appropriate for gestational age preterm infants born at 28–36 weeks of gestation: a multicentre study in Ethiopia
Source: PubMed Central journal article supplement (PMC7493091; doi:10.1136/bmjpo-2020-000740), 2020-09-15

# BMJ Paediatrics Open

BMJ Paediatrics Open is committed to open peer review. As part of this commitment we make the peer review history of every article we publish publicly available.

When an article is published we post the peer reviewers' comments and the authors' responses online. We also post the versions of the paper that were used during peer review. These are the versions that the peer review comments apply to.

The versions of the paper that follow are the versions that were submitted during the peer review process. They are not the versions of record or the final published versions. They should not be cited or distributed as the published version of this manuscript.

BMJ Paediatrics Open is an open access journal and the full, final, typeset and author-corrected version of record of the manuscript is available on our site with no access controls, subscription charges or pay-per-view fees (<http://bmjpaedsopen.bmj.com>).

If you have any questions on BMJ Paediatrics Open's open peer review process please email [info.bmjpo@bmj.com](mailto:info.bmjpo@bmj.com)

# BMJ Paediatrics Open

## Comparison of neonatal outcomes of small for gestational age and appropriate for gestational age preterm infants born at 28 to 36 weeks of gestation

|                               |                                                                                                                                                                                                                                                                                                                                                                                                                                                                                                                                                                                                                                                                                                                              |
|-------------------------------|------------------------------------------------------------------------------------------------------------------------------------------------------------------------------------------------------------------------------------------------------------------------------------------------------------------------------------------------------------------------------------------------------------------------------------------------------------------------------------------------------------------------------------------------------------------------------------------------------------------------------------------------------------------------------------------------------------------------------|
| Journal:                      | <i>BMJ Paediatrics Open</i>                                                                                                                                                                                                                                                                                                                                                                                                                                                                                                                                                                                                                                                                                                  |
| Manuscript ID                 | bmjpo-2020-000740                                                                                                                                                                                                                                                                                                                                                                                                                                                                                                                                                                                                                                                                                                            |
| Article Type:                 | Original research                                                                                                                                                                                                                                                                                                                                                                                                                                                                                                                                                                                                                                                                                                            |
| Date Submitted by the Author: | 21-May-2020                                                                                                                                                                                                                                                                                                                                                                                                                                                                                                                                                                                                                                                                                                                  |
| Complete List of Authors:     | Gidi, Netsanet; Jimma University College of Public Health and Medical Sciences, Pediatric and child health; Ludwig-Maximilians-Universitat Munchen Center for International Health<br>Goldenberg , Robert L. ; Columbia University<br>Nigussie, Assaye K. ; Bill and Melinda Gates Foundation<br>McClure, Elizabeth; RTI International<br>Mekasha, Amha; Addis Ababa University College of Health Sciences<br>Worku, Bogale; Ethiopian Pediatric Society<br>Siebeck, Matthias; Medical Center of the University of Munich (LMU)<br>Genzel-Boroviczeny, Orsolya; Ludwig Maximilian University of Munich ,<br>Dr. von Hauner University Children's Hospital<br>Muhe, Lulu M; Addis Ababa University College of Health Sciences |
| Keywords:                     | Neonatology, Mortality                                                                                                                                                                                                                                                                                                                                                                                                                                                                                                                                                                                                                                                                                                       |
|                               |                                                                                                                                                                                                                                                                                                                                                                                                                                                                                                                                                                                                                                                                                                                              |

SCHOLARONE™  
Manuscripts

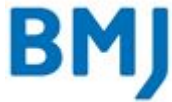

I, the Submitting Author has the right to grant and does grant on behalf of all authors of the Work (as defined in the below author licence), an exclusive licence and/or a non-exclusive licence for contributions from authors who are: i) UK Crown employees; ii) where BMJ has agreed a CC-BY licence shall apply, and/or iii) in accordance with the terms applicable for US Federal Government officers or employees acting as part of their official duties; on a worldwide, perpetual, irrevocable, royalty-free basis to BMJ Publishing Group Ltd ("BMJ") its licensees and where the relevant Journal is co-owned by BMJ to the co-owners of the Journal, to publish the Work in this journal and any other BMJ products and to exploit all rights, as set out in our [licence](#).

The Submitting Author accepts and understands that any supply made under these terms is made by BMJ to the Submitting Author unless you are acting as an employee on behalf of your employer or a postgraduate student of an affiliated institution which is paying any applicable article publishing charge ("APC") for Open Access articles. Where the Submitting Author wishes to make the Work available on an Open Access basis (and intends to pay the relevant APC), the terms of reuse of such Open Access shall be governed by a Creative Commons licence – details of these licences and which [Creative Commons](#) licence will apply to this Work are set out in our licence referred to above.

Other than as permitted in any relevant BMJ Author's Self Archiving Policies, I confirm this Work has not been accepted for publication elsewhere, is not being considered for publication elsewhere and does not duplicate material already published. I confirm all authors consent to publication of this Work and authorise the granting of this licence.

1  
2  
3 **Title: Comparison of neonatal outcomes of small for gestational age and appropriate for**  
4 **gestational age preterm infants born at 28 to 36 weeks of gestation**  
5  
6  
7

8  
9 **Authors:** Netsanet Workneh Gidi<sup>a,h</sup>, Robert L. Goldenberg<sup>b</sup>, Assaye K. Nigussie<sup>c</sup>, Elizabeth M.  
10 McClure<sup>d</sup>, Amha Mekasha<sup>e</sup>, Bogale Worku<sup>f</sup>, Matthias Siebeck<sup>g</sup>, Orsolya Genzel-Boroviczény<sup>g</sup>,  
11  
12 Lulu M. Muhe<sup>e</sup>  
13  
14  
15

16  
17 **Affiliations**  
18

19  
20 <sup>a</sup> Institute of Health Sciences, Jimma University, Jimma, Ethiopia  
21

22 <sup>b</sup> Columbia University, New York, NY, USA  
23

24 <sup>c</sup> Bill and Melinda Gates Foundation, Seattle, WA, USA  
25

26 <sup>d</sup> RTI International, 3040 Cornwallis Rd., Durham, NC, 27709, USA  
27

28 <sup>e</sup> College of Health Sciences, Addis Ababa University, Addis Ababa, Ethiopia  
29

30 <sup>f</sup> Ethiopian Pediatric Society, Addis Ababa, Ethiopia  
31

32 <sup>g</sup> LMU University Hospital, Munich, Germany  
33

34 <sup>h</sup> Center for International Health, LMU University Hospital, Munich, Germany  
35  
36

37  
38  
39  
40  
41 **Corresponding author:** Netsanet Workneh (MD, DTM&H)  
42

43  
44 College of public health and medical sciences, Jimma University, Jimma, Ethiopia  
45

46 PhD candidate, at CIHLMU, Munich, Germany  
47

48 Phone: +251 917762109  
49

50 Email: konetsanet@gmail.com, or Netsanet.Workneh@lrz.uni-muenchen.de  
51

52 **Word count:** 1912  
53  
54  
55  
56  
57  
58  
59  
60

## ABSTRACT

**Purpose:** The aim of this study was to assess morbidity and mortality pattern of small for gestational age (SGA) preterm infants in comparison to appropriate for gestational age (AGA) preterm infants of similar gestational age.

**Method:** We compared neonatal outcomes of 1336, 1:1 matched, singleton SGA and AGA preterm infants based on their gestational age using data from the study “Causes of Illness and Death of Preterm Infants in Ethiopia (SIP)”. Data were analyzed using SPSS version 23. Chi square test, odds ratio and 95 % confidence intervals (95%CI) were done, p-value of <0.05 was considered statistically significant.

**Result:** The majority of the infants 1194 (89%) were moderate to late preterm (32 to 36 weeks of gestation), 763 (57%) were females. Male preterm infants had higher risk of being SGA than female infants, 61.6% versus 41.3%. SGA infants had increased risk of hypoglycemia (OR and 95% CI of 1.6 (1.2-2.0), necrotizing enterocolitis (NEC) 2.3(1.2-4.1), polycythemia 3.0 (1.6-5.4), late onset neonatal sepsis (LOS) 3.6 (1.1-10.9)) and prolonged hospitalization 2.9 (2.0-4.2). The rates of respiratory distress syndrome (RDS), apnea and mortality were similar in the SGA and AGA groups.

**Conclusion:** Neonatal complications such as hypoglycemia, NEC, LOS, polycythemia and prolonged hospitalization are more common in SGA infants; while rates of RDS and mortality are similar in SGA and AGA groups. Early recognition of SGA status, high index of suspicion and screening for complications associated, and timely intervention to prevent complications need due consideration.

## INTRODUCTION

Globally, intrauterine growth restriction (IUGR) occurs in about 24% of newborns per year, and the majority are born in developing countries.[1] IUGR is one of the rising public health challenges, because it contributes to increased risk of neonatal morbidity and mortality, and chronic diseases in adulthood.[2-4] Small for gestational age (SGA) is commonly defined as birthweight-for-gestational-age measure below the 10th percentile compared to a gender-specific reference population.[5] IUGR and SGA can only be distinguished if prenatal ultra sounds are available. IUGR occurs due to compromised fetal growth usually due to placental malfunction for various reasons, such as maternal hypertension, diabetes, cardiopulmonary disease, anemia, malnutrition and multiple pregnancies.[6, 7] Congenital malformations and fetal infection may also lead to SGA. IUGR and SGA are commonly used interchangeably and for this paper we will refer to these conditions as SGA.[6]

Conditions, such as multiple pregnancies or pregnancies complicated by maternal hypertension or other placental dysfunction, cause increased secretion of glucocorticoids, other steroid hormones and catecholamines that results in acceleration of brain and lung maturation by as much as 3 to 4 weeks or more when compared to the AGA infants of the same gestational age (GA); this is considered an adaptation to early extrauterine life.[9-11] However, this adaptive response may fail if the placental dysfunction progresses and the fetus experiences severe anoxia and malnutrition that could result in increased risk of complications and death.[2, 11]

1  
2  
3 Several studies have reported contradictory findings on the morbidity and mortality patterns of  
4 SGA infants.[8] The risk of respiratory distress syndrome (RDS) has been reported to be same  
5 or lower in SGA infants compared to AGA infants of similar GA,[12-14] but numerous studies  
6 have reported increased risk of morbidity and mortality in SGA infants.[3,13,15-19] Neonatal  
7 outcomes of SGA infants generally depend on the timing of the onset of placental insufficiency,  
8 the severity of growth restriction, the degree of cardiovascular adaptation, and GA at birth.[20]  
9  
10 SGA infants are at higher risk of metabolic and hematological disturbances and those with severe  
11 SGA are more likely to die during the neonatal period.[11, 18] Those who survive the neonatal  
12 period have a high risk of growth and developmental impairment in childhood, and metabolic,  
13 hormonal and cognitive disorders later in adulthood.[7, 21] Most of the studies on preterm  
14 infants' health and SGA are reported from developed countries and there is a paucity of data  
15 from low- income countries where the burden is very high.[22] The aim of this study is to assess  
16 morbidity and mortality pattern of SGA infants in comparison to AGA infants of same GA.  
17  
18  
19  
20  
21  
22  
23  
24  
25  
26  
27  
28  
29  
30  
31  
32  
33  
34  
35

## 36 **METHOD**

### 37 **Data source**

38  
39  
40 We analyzed maternal obstetric and clinical data of GA matched SGA and AGA preterm infants  
41 admitted to neonatal intensive units (NICUs) from a study on Causes of Illness and Death of  
42 Preterm Infants in Ethiopia (SIP). SIP was a prospective descriptive multisite hospital-based  
43 study conducted in 5 selected hospitals in Ethiopia. The protocol and the primary result have  
44 been published.[23, 24]  
45  
46  
47  
48  
49  
50  
51  
52  
53  
54  
55  
56  
57  
58  
59  
60

## **Patient involvement**

Patients were not directly involved in design, patient recruitment or plan to disseminate the study results.

## **Inclusion and exclusion criteria**

After exclusion of multiple births, those with congenital malformations and chromosomal disorders and large for gestational age (LGA) infants, SGA infants were identified and 1:1 match with AGA preterm infants was done randomly. Weight for GA was assessed based on gender and GA specific Fenton growth charts.[25] SGA was defined as a birth weight below the 10<sup>th</sup> percentile for GA, and AGA birth weight was defined as between the 10<sup>th</sup> and 90<sup>th</sup> percentile for GA.

## **Outcome variables**

The association of SGA with gender, mortality, length of hospital stay, clinical diagnoses such as RDS, necrotizing enterocolitis (NEC), neonatal infections, hypoglycemia, perinatal asphyxia and polycythemia were analyzed. Maternal obstetric variables such as maternal age, marital status, pregnancy induced hypertension, premature rupture of membranes (PROM), antepartum hemorrhage, chorioamnionitis, dexamethasone administration and mode of delivery were assessed for association with birth weight for GA.



GA estimation was based on maternal menstrual history, early fetal ultrasound or New Ballard Score examination. Complications of preterm birth such as RDS and neonatal infections were diagnosed based on clinical findings and investigations including chest x-ray, blood culture and white blood cell count. Death before the 28<sup>th</sup> day of life was defined as neonatal mortality.

### Statistical analysis

Statistical Analysis was done using the SPSS statistical program. Differences in association of the outcome variables were analyzed with Chi-square tests and a p-value of <0.05 was considered significant. Odds ratios (OR) and 95% confidence intervals (95% CI) were calculated to identify clinical variables associated with SGA.

Ethical approval was obtained from Addis Ababa University College of health Sciences institutional review board (Ethics ID: AAUMF 03-008) before the study was commenced. The parents of the infants were given adequate information and asked for informed consent prior to participation.

### RESULT

A total of 1336 singleton SGA and AGA preterm infants were eligible for the study (Figure1); 763 (57%) were females. The majority of the infants, 1194 (89%) were moderate to late preterm (32 to 36 weeks of GA), and 893 (67%) of the infants had a birthweight greater than 1500 grams. The common complications the infants had are shown in table 1.

**Table 1. Preterm infants' perinatal data**

| Variables                       | No (%)     |
|---------------------------------|------------|
| <b>Infants sex</b>              |            |
| Male                            | 573 (42.9) |
| Female                          | 763 (57.1) |
| <b>Birthweight in grams</b>     |            |
| <1000                           | 78 (5.8)   |
| 1000 to 1499                    | 365 (27.3) |
| 1500 to 1999                    | 538 (40.3) |
| ≥2000                           | 355 (26.6) |
| <b>Gestational Age in weeks</b> |            |
| 28 to 32                        | 242 (18.1) |
| 33 to 34                        | 562 (42.1) |
| 35 to 36                        | 532 (38.8) |
| <b>Common morbidities</b>       |            |
| Neonatal infections             | 696 (52.1) |
| Respiratory distress syndrome   | 514 (38.5) |
| Hypoglycemia                    | 326 (24.4) |
| Hyperbilirubinemia              | 417 (31.2) |
| Perinatal asphyxia              | 98 (7.3)   |
| Polycythemia                    | 58 (4.3)   |

The male preterm infants had a higher risk of SGA than female infants of similar GA, 61.6% versus 41.3%, (p-value =.000). Maternal age and marital status were not associated with SGA, while pregnancy induced hypertension had a statistically significant association with SGA. SGA infants were more likely to be delivered by caesarian section than AGA preterm infants, (p-value=.000). Prophylactic dexamethasone was given more often to the mothers of the preterm infants who were SGA, (p-value = .017). Other obstetric factors studied such as PROM, antepartum hemorrhage, and chorioamnionitis were more common in mothers of AGA preterm infants, (p-value <0.01) (Table 2).

**Table 2. Factors associated with birth weight for gestational age.**

| Variables, No (%)                    | Total       | SGA<br>N=668 | AGA<br>N=668 | P-value |
|--------------------------------------|-------------|--------------|--------------|---------|
| <b>Maternal age</b>                  |             |              |              | .303    |
| <20 years                            | 236 (17.7)  | 115 (17.2)   | 121 (18.1)   |         |
| 20 to 34 years                       | 980 (73.4)  | 485 (72.6)   | 495 (74.1)   |         |
| ≥35 years                            | 120 (9.0)   | 88 (13.2)    | 52 (7.9)     |         |
| <b>Marital Status</b>                |             |              |              | .207    |
| Married                              | 1283 (96.0) | 637 (95.4)   | 647 (96.9)   |         |
| Single                               | 53 (4.0)    | 31(4.6)      | 21 (3.1)     |         |
| <b>Mode of Delivery</b>              |             |              |              | .000    |
| Cesarean section                     | 509 (38.1)  | 283 (42.3)   | 226 (33.3)   |         |
| Vaginal delivery                     | 827 (61.9)  | 385 (57.3)   | 442 (66.1)   |         |
| <b>Major obstetric complications</b> |             |              |              |         |
| Pregnancy induced hypertension       | 445 (33.3)  | 290 (43.4)   | 155 (23.2)   | .000    |
| PROM                                 | 191 (14.4)  | 72 (10.8)    | 120 (17.9)   | .000    |
| Antepartum hemorrhage                | 158 (11.8)  | 63 (9.4)     | 95 (14.2)    | .007    |
| Chorioamnionitis                     | 61 (4.6)    | 14 (2.1)     | 47 (7.0)     | .000    |
| Mother received dexamethasone        | 435 (32.6)  | 238 (35.6)   | 197 (29.5)   | .017    |
| <b>Sex of the infant</b>             |             |              |              | .000    |
| Male                                 | 573 (42.9)  | 353 (52.8)   | 220 (32.9)   |         |
| Female                               | 763 (57.1)  | 315 (47.2)   | 448 (67.1)   |         |

AGA= Appropriate for gestational age, SGA = Small for gestational age, PROM= Premature rupture of membranes

The rates of RDS, apnea and mortality were similar among the SGA and AGA groups. While SGA infants had a 1.6 times higher risk of developing hypoglycemia, p-value = .000, OR = 1.58, 95% CI (1.23-2.04). NEC was diagnosed in 5.2% of SGA and 2.4% of AGA infants, p-value =.007, odds ratio = 2.25 95% CI (1.24-4.11). Polycythemia was seen more often in SGA infants,

p-value =.000, OR=3.00 95% CI (1.65-5.45). Similar rates of neonatal infections were seen in both groups, while SGA infants had 3.6 times higher risk of developing late onset neonatal sepsis than AGA preterm infants, p-value=.018, OR = 3.55 95%CI (1.16-10.85). SGA infants were more likely to be hospitalized for more than 21 days than AGA preterm infants, p-value =.000, OR=2.90, 95%CI (1.98-4.24) (Table 3).

**Table 3. Comparison of neonatal outcomes of small for gestational age and appropriate for gestational age preterm infants**

| Variables               | SGA<br>(N=668) | AGA<br>(N=668) | P-value | Odds<br>ratio | 95 % CI |       |
|-------------------------|----------------|----------------|---------|---------------|---------|-------|
|                         |                |                |         |               | Lower   | Upper |
| RDS                     | 257 (38.5)     | 257 (38.5)     | 1.00    | 1.00          | .80     | 1.25  |
| Apnea                   | 66 (9.9)       | 54 (8.0)       | .251    | 1.25          | .86     | 1.82  |
| Hypoglycemia            | 191 (28.6)     | 135 (20.2)     | .000    | 1.58          | 1.23    | 2.04  |
| NEC                     | 35 (5.2)       | 16 (2.4)       | .007    | 2.25          | 1.24    | 4.11  |
| Polycythemia            | 43 (6.4)       | 15 (2.2)       | .000    | 3.00          | 1.65    | 5.45  |
| EOS                     | 275 (41.2)     | 271 (40.6)     | .824    | 1.03          | .82     | 1.28  |
| LOS                     | 14 (2.1)       | 4 (0.6)        | .018    | 3.55          | 1.16    | 10.85 |
| Hyperbilirubinemia      | 196            | 221            | .140    | .84           | .67     | 1.06  |
| Perinatal asphyxia      | 48             | 50             | .834    | .96           | .63     | 1.44  |
| Mortality               | 51 (7.6)       | 51 (7.6)       | 1.00    | 1.00          | .67     | 1.50  |
| Length of hospital Stay |                |                |         |               |         |       |
| <21 days                | 564 (84.4)     | 628 (94.0)     | -       | -             | -       | -     |
| ≥21days                 | 104 (15.6)     | 40 (6.0)       | .000    | 2.90          | 2.98    | 4.24  |

AGA= Appropriate for gestational age, SGA = Small for gestational age, RDS = Respiratory distress syndrome, NEC = necrotizing enterocolitis, EOS = Early onset neonatal sepsis, LOS = Late onset neonatal sepsis

## DISCUSSION

Comparison of neonatal outcomes of SGA and AGA preterm infants remains controversial, as several investigators have reported conflicting data. In the current study, the rates of RDS and mortality among the two groups were similar. These findings were in line with the findings of Bartal et al.[14] And our findings contradict the reports of Tsai et al. and Sharma et al, who reported an increased risk of RDS and mortality among SGA infants.[13, 26] However, Bartels et al and Tyson et al reported increased risk of death and decreased risk of RDS.[12, 19] The contradicting findings in the literature might be due to the multifactorial nature of outcome of SGA, the cause of SGA and severity of the condition, and duration of intrauterine hypoxia. The GA at birth could modify the physiologic changes and adaptation to extrauterine environment.

The SGA infants were more likely to be delivered by cesarean section (p-value =.000) and their mothers were given prophylactic dexamethasone more often compared to mothers of AGA infants (p-value = .017). Pregnancy induced hypertension was associated with the SGA (p-value =.000) whereas acute obstetric condition such as antepartum hemorrhage, chorioamnionitis, and PROM were more common in mothers of AGA infants. This finding is similar to the report of Boghossian et al.[27]

The rate of early onset neonatal infection was comparable in both groups, however SGA infants had a higher risk of late onset neonatal sepsis. Similarly, SGA infants had an increased risk of NEC and hypoglycemia compared to AGA infants. These findings are consistent with reports of Hasthi et al. from India and Boghossian et al. from USA.[15, 27] These can likely be explained by the severe undernutrition the infants experienced predisposing them to infection, although the

1  
2  
3 mechanisms of how under-nutrition is related to immune suppression is not well understood,  
4  
5 there are strong epidemiologic data supporting the link.[28] The increased risk of NEC might be  
6  
7 associated with immature gut development that has resulted from intrauterine chronic fetal  
8  
9 hypoxia and consequent cardiovascular redistribution of blood flow away from the  
10  
11 gastrointestinal tract to vital organs.[29]  
12  
13

14  
15 SGA infants had a statistically significant increased risk of prolonged hospitalization for more  
16  
17 than 21 days, likely related to the severity of the morbidities they had; Sharma et al from USA  
18  
19 reported a similar finding in a retrospective study involving 2,530 infants born at  $\leq 36$  week.[19]  
20  
21 Polycythemia (a venous hematocrit above 65%) can occur as a response to intrauterine hypoxia,  
22  
23 the hyper-viscosity of blood associated might result in serious complications.[30] SGA infants  
24  
25 are at higher risk of developing polycythemia.[2] Similarly, we found a 3-fold increased risk of  
26  
27 polycythemia in SGA compared to AGA infants.  
28  
29  
30  
31  
32  
33  
34  
35  
36  
37  
38  
39

## 40 CONCLUSION

41  
42 The SGA infants in this study had increased risk of hypoglycemia, NEC, late onset neonatal  
43  
44 sepsis, polycythemia and prolonged hospitalization. The rates of RDS and neonatal mortality  
45  
46 were similar in SGA and AGA infants. Proper antenatal care, timely recognition of high risk  
47  
48 pregnancies and right interventions are needed to prevent IUGR and the subsequent SGA related  
49  
50 complications. Screening for morbidities associated with SGA, preventive measures and  
51  
52 adequate postnatal care could contribute for improvement of neonatal outcomes.  
53  
54  
55  
56  
57  
58  
59  
60

1  
2  
3 **ACKNOWLEDGMENTS:** We would like to thank Bill and Melinda Gates foundation for  
4  
5 funding the SIP study: Our special appreciation goes to all families who participated in the study  
6  
7 and all health care workers in the five hospitals who helped us in data collection and completion  
8  
9 of the study. And Assistance provided by administrators of neonatal intensive care units and  
10  
11 hospital managers was greatly appreciated.  
12  
13

14  
15 **COMPETING INTERESTS:** The Authors declare that there is no conflict of interest.  
16  
17

18  
19 **FUNDING:** The study was funded by Bill and Melinda Gates foundation  
20  
21

22 **CONTRIBUTORSHIP STATEMENT:**  
23

24  
25 The primary study from which the data was extracted “Causes of Illness and Death of Preterm  
26  
27 Infants in Ethiopia (SIP)” was conceptualized and designed by AKN and LMM; data collection  
28  
29 was monitored by LMM, BW, EMM, AM and RLG. NWG analyzed the data and drafted the  
30  
31 manuscript and RLG, AKN, EMM, AM, BW, MS, OG and LMM contributed in the writing and  
32  
33 reviewing the manuscript. All authors have revised the work critically and approved the final  
34  
35 manuscript as submitted.  
36  
37  
38  
39  
40  
41  
42  
43  
44  
45  
46  
47  
48  
49  
50  
51  
52  
53  
54  
55  
56  
57  
58  
59  
60

### **What is already known on this topic?**

Intrauterine growth restriction is one of the common perinatal complications associated with increased neonatal morbidity and mortality. As an adaptation to early extrauterine life, in utero stress associated with placental insufficiency increases secretion of steroid hormones in the fetus. This results in acceleration of brain and lung maturation, however several studies have reported contradictory findings on the morbidity and mortality patterns of SGA infants.

### **What this study adds?**

Accelerated maturity associated with intrauterine growth restriction expected in SGA preterm infants did not protect them from RDS and mortality. Rather, SGA infants have significantly increased risk of hypoglycemia, necrotizing enterocolitis, polycythemia, late onset neonatal sepsis and prolonged hospitalization. The contradicting findings in the literature might be due to the multifactorial nature of outcome of SGA, which depends on the degree of fetal compromise.



**REFERENCES**

1. De Onis M, Blössner M, Villar JO. Levels and patterns of intrauterine growth retardation in developing countries. *Eur J Clin Nutr* 1998;52:S5.
2. Colella M, Frérot A, Novais ARB, et al. Neonatal and Long-Term Consequences of Fetal Growth Restriction. *Curr Pediatr Rev* 2018;14:212–218.
3. Engineer N, Kumar S. Perinatal variables and neonatal outcomes in severely growth restricted preterm fetuses. *Acta Obstet Gynecol Scand* 2010;89:1174–1181.
4. Garite TJ, Clark R, Thorp JA. Intrauterine growth restriction increases morbidity and mortality among premature neonates. *Am J Obstet Gynecol. Journal* 2004;191:481–487.
5. Physical status: the use and interpretation of anthropometry. Report of a WHO Expert Committee. *World Health Organ Tech Rep Ser* 1995;854:1–452.
6. Ota E, Ganchimeg T, Morisaki N, et al. WHO Multi-Country Survey on Maternal and Newborn Health Research Network. Risk factors and adverse perinatal outcomes among term and preterm infants born small-for-gestational-age: secondary analyses of the WHO Multi-Country Survey on Maternal and Newborn Health. *PLoS One* 2014;9(8).
7. Suhag A, Berghella V. Intrauterine growth restriction (IUGR): etiology and diagnosis. *Current Obstetrics and Gynecology Reports* 2013;2:102–111.
8. Arigliani M, Spinelli AM, Liguoro I, et al. Nutrition and Lung Growth. *Nutrients* 2018;10:919.
9. Amiel-Tison C, Cabrol D, Denver R, et al. Fetal adaptation to stress: Part I: Acceleration of fetal maturation and earlier birth triggered by placental insufficiency in humans. *Early Hum Dev* 2004;78:15–27.

- 1  
2  
3 10. Nobile S, Marchionni P, Carnielli VP. Neonatal outcome of small for gestational age  
4 preterm infants. *Eur J Pediatr* 2017;176:1083–1088.  
5  
6  
7  
8 11. Amiel-Tison C, Pettigrew AG. Adaptive changes in the developing brain during  
9 intrauterine stress. *BRAIN DEV JPN* 1991;13:67–76.  
10  
11  
12 12. Bartels DB, Kreienbrock L, Dammann O, et al. Population based study on the outcome of  
13 small for gestational age newborns. *Arch Dis Child Fetal Neonatal Ed* 2005;90:F53–9.  
14  
15  
16  
17 13. Tsai LY, Chen YL, Tsou KI, et al. Taiwan Premature Infant Developmental  
18 Collaborative Study Group. The impact of small-for-gestational-age on neonatal outcome  
19 among very-low-birth-weight infants. *Pediatr Neonatol* 2015;56:10110–7.  
20  
21  
22  
23 14. Fishel Bartal M, Chen HY, Blackwell SC, et al. Neonatal morbidity in late preterm small  
24 for gestational age neonates. *J Matern Fetal Neonatal Med* 2019 23:1–6.  
25  
26  
27  
28 15. Hasthi UR, Ashwani N, Kumar CS, et al. Morbidity and Mortality Patterns in Small for  
29 Gestational Age versus Appropriate for Gestational Age Preterm Neonates Admitted in  
30 Level II Neonatal Intensive Care Unit: A Observational Study. *Int J Sci Study*  
31 2017;4:133–136.  
32  
33  
34  
35  
36  
37  
38  
39  
40 16. Simchen MJ, Beiner ME, Strauss-Liviathan N, et al. Neonatal outcome in growth-  
41 restricted versus appropriately grown preterm infants. *Am J Perinatol* 2000;17(04):187–  
42 192.  
43  
44  
45  
46  
47 17. Giapros V, Drougia A, Krallis N, et al. Morbidity and mortality patterns in small-for-  
48 gestational age infants born preterm. *J Matern Fetal Neonatal Med* 2012;25:153–157.  
49  
50  
51  
52 18. Qiu X, Lodha A, Shah PS, et al. Canadian Neonatal Network. Neonatal outcomes of  
53 small for gestational age preterm infants in Canada. *Am. J. Perinatol* 2012 ;29:87–94.  
54  
55  
56  
57  
58  
59  
60

- 1  
2  
3 19. Sharma P, McKay K, Rosenkrantz TS, et al. Comparisons of mortality and pre-discharge  
4 respiratory outcomes in small-for-gestational-age and appropriate-for-gestational-age  
5 premature infants. *BMC Pediatr* 2004;4:9.  
6  
7  
8  
9  
10 20. Malhotra A, Allison BJ, Jenkin G, et al. Neonatal morbidities of fetal growth restriction:  
11 pathophysiology and impact. *Front Endocrinol* 2019;10:55.  
12  
13  
14 21. Longo S, Bollani L, Decembrino L, et al. Short-term and long-term sequelae in  
15 intrauterine growth retardation (IUGR). *J Matern Fetal Neonatal Med* 2013;26:222–225.  
16  
17  
18 22. Katz J, Lee AC, Kozuki N, et al. Mortality risk in preterm and small-for-gestational-age  
19 infants in low-income and middle-income countries: a pooled country analysis. *Lancet*  
20 2013;382:417–25.  
21  
22  
23 23. Muhe LM, McClure EM, Mekasha A, et al. A prospective study of causes of illness and  
24 death in preterm infants in Ethiopia: the SIP study protocol. *Reprod. Health* 2018  
25 ;15:116.  
26  
27  
28 24. Muhe LM, McClure EM, Nigussie AK, et al. Major causes of death in preterm infants in  
29 selected hospitals in Ethiopia (SIP): a prospective, cross-sectional, observational study.  
30  
31  
32 *Lancet Glob Health* 2019 ;7:e1130-8.  
33  
34  
35 25. Fenton TR, Kim JH. A systematic review and meta-analysis to revise the Fenton growth  
36 chart for preterm infants. *BMC Pediatr* 2013;13:59.  
37  
38  
39 26. Tyson JE, Kennedy K, Broyles S, et al. The small for gestational age infant: accelerated  
40 or delayed pulmonary maturation? Increased or decreased survival?. *Pediatrics*  
41 1995;95:534–538.  
42  
43  
44 27. Boghossian NS, Geraci M, Edwards EM, et al. Morbidity and mortality in small for  
45 gestational age infants at 22 to 29 weeks' gestation. *Pediatrics* 2018;141:e20172533.  
46  
47  
48  
49  
50  
51  
52  
53  
54  
55  
56  
57  
58  
59  
60

- 1  
2  
3 28. Jones KD, Berkley JA, Warner JO. Perinatal nutrition and immunity to infection. *Pediatr*  
4  
5 *Allergy Immunol* 2010;21:564–576.  
6  
7  
8 29. Bozzetti V, Tagliabue PE. Enteral feeding of intrauterine growth restriction preterm  
9  
10 infants: theoretical risks and practical implications. *Pediatr Med Chir* 2017;39:160  
11  
12 30. Sarkar S, Rosenkrantz TS. Neonatal polycythemia and hyperviscosity. *Semin Fetal*  
13  
14 *Neonatal Med* 2008;13:248–255  
15  
16  
17  
18  
19  
20  
21  
22  
23  
24  
25  
26  
27  
28  
29  
30  
31  
32  
33  
34  
35  
36  
37  
38  
39  
40  
41  
42  
43  
44  
45  
46  
47  
48  
49  
50  
51  
52  
53  
54  
55  
56  
57  
58  
59  
60

1  
2  
3  
4  
5  
6  
7  
8  
9  
10  
11  
12  
13  
14  
15  
16  
17  
18  
19  
20  
21  
22  
23  
24  
25  
26  
27  
28  
29  
30  
31  
32  
33  
34  
35  
36  
37  
38  
39  
40  
41  
42  
43  
44  
45  
46  
47  
48  
49  
50  
51  
52  
53  
54  
55  
56  
57  
58  
59  
60

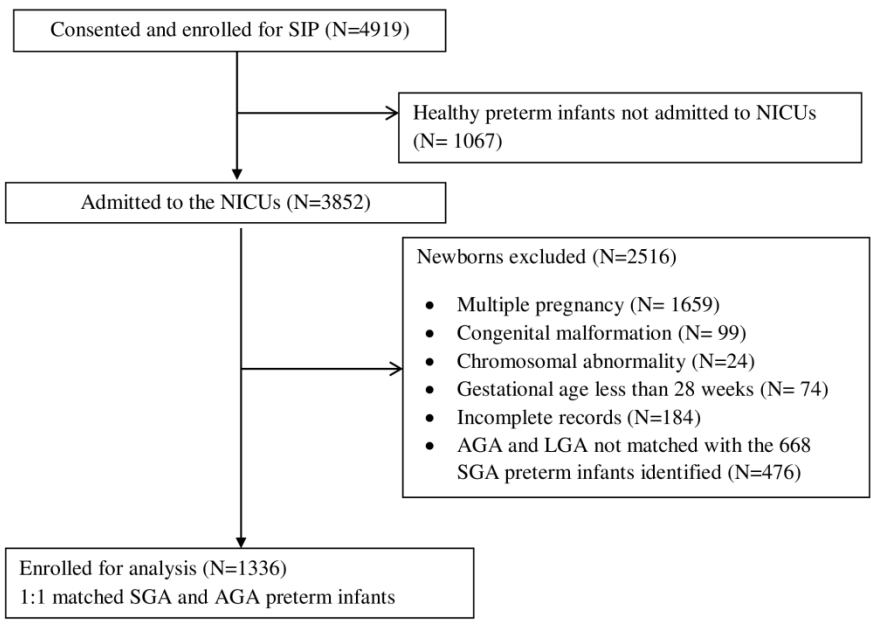

# BMJ Paediatrics Open

**Title: Comparison of neonatal outcomes of small for gestational age and appropriate for gestational age preterm infants born at 28 to 36 weeks of gestation, a multicenter study in Ethiopia**

|                               |                                                                                                                                                                                                                                                                                                                                                                                                                                                                                                                                                                                                                                                                                                   |
|-------------------------------|---------------------------------------------------------------------------------------------------------------------------------------------------------------------------------------------------------------------------------------------------------------------------------------------------------------------------------------------------------------------------------------------------------------------------------------------------------------------------------------------------------------------------------------------------------------------------------------------------------------------------------------------------------------------------------------------------|
| Journal:                      | <i>BMJ Paediatrics Open</i>                                                                                                                                                                                                                                                                                                                                                                                                                                                                                                                                                                                                                                                                       |
| Manuscript ID                 | bmjpo-2020-000740.R1                                                                                                                                                                                                                                                                                                                                                                                                                                                                                                                                                                                                                                                                              |
| Article Type:                 | Original research                                                                                                                                                                                                                                                                                                                                                                                                                                                                                                                                                                                                                                                                                 |
| Date Submitted by the Author: | 25-Jul-2020                                                                                                                                                                                                                                                                                                                                                                                                                                                                                                                                                                                                                                                                                       |
| Complete List of Authors:     | Gidi, Netsanet; Jimma University College of Public Health and Medical Sciences, Pediatric and child health; Ludwig-Maximilians-Universitat Munchen Center for International Health Goldenberg , Robert L. ; Columbia University Nigussie, Assaye K. ; Bill and Melinda Gates Foundation McClure, Elizabeth; RTI International Mekasha, Amha; Addis Ababa University College of Health Sciences Worku, Bogale; Ethiopian Pediatric Society Siebeck, Matthias; Medical Center of the University of Munich (LMU) Genzel-Boroviczeny, Orsolya; Ludwig Maximilian University of Munich , Dr. von Hauner University Children's Hospital Muhe, Lulu M; Addis Ababa University College of Health Sciences |
| Keywords:                     | Neonatology, Mortality                                                                                                                                                                                                                                                                                                                                                                                                                                                                                                                                                                                                                                                                            |
|                               |                                                                                                                                                                                                                                                                                                                                                                                                                                                                                                                                                                                                                                                                                                   |

SCHOLARONE™  
Manuscripts



I, the Submitting Author has the right to grant and does grant on behalf of all authors of the Work (as defined in the below author licence), an exclusive licence and/or a non-exclusive licence for contributions from authors who are: i) UK Crown employees; ii) where BMJ has agreed a CC-BY licence shall apply, and/or iii) in accordance with the terms applicable for US Federal Government officers or employees acting as part of their official duties; on a worldwide, perpetual, irrevocable, royalty-free basis to BMJ Publishing Group Ltd ("BMJ") its licensees and where the relevant Journal is co-owned by BMJ to the co-owners of the Journal, to publish the Work in this journal and any other BMJ products and to exploit all rights, as set out in our [licence](#).

The Submitting Author accepts and understands that any supply made under these terms is made by BMJ to the Submitting Author unless you are acting as an employee on behalf of your employer or a postgraduate student of an affiliated institution which is paying any applicable article publishing charge ("APC") for Open Access articles. Where the Submitting Author wishes to make the Work available on an Open Access basis (and intends to pay the relevant APC), the terms of reuse of such Open Access shall be governed by a Creative Commons licence – details of these licences and which [Creative Commons](#) licence will apply to this Work are set out in our licence referred to above.

Other than as permitted in any relevant BMJ Author's Self Archiving Policies, I confirm this Work has not been accepted for publication elsewhere, is not being considered for publication elsewhere and does not duplicate material already published. I confirm all authors consent to publication of this Work and authorise the granting of this licence.

1  
2  
3 **Title: Comparison of neonatal outcomes of small for gestational age and appropriate for**  
4 **gestational age preterm infants born at 28 to 36 weeks of gestation, a multicenter study in**  
5  
6  
7 **Ethiopia**

8  
9  
10 **Authors:** Netsanet Workneh Gidi<sup>a,i</sup>, Robert L. Goldenberg<sup>b</sup>, Assaye K. Nigussie<sup>c</sup>, Elizabeth M.  
11  
12 McClure<sup>d</sup>, Amha Mekasha<sup>e</sup>, Bogale Worku<sup>f</sup>, Matthias Siebeck<sup>g</sup>, Orsolya Genzel-Boroviczény<sup>h</sup>,  
13  
14 Lulu M. Muhe<sup>e</sup>  
15  
16

17  
18 **Affiliations**  
19

20  
21  
22 <sup>a</sup> Institute of Health Sciences, Jimma University, Jimma, Ethiopia  
23

24 <sup>b</sup> Columbia University, New York, NY, USA  
25

26 <sup>c</sup> Bill and Melinda Gates Foundation, Seattle, WA, USA  
27

28  
29 <sup>d</sup> RTI International, 3040 Cornwallis Rd., Durham, NC, 27709, USA  
30

31 <sup>e</sup> College of Health Sciences, Addis Ababa University, Addis Ababa, Ethiopia  
32

33 <sup>f</sup> Ethiopian Pediatric Society, Addis Ababa, Ethiopia  
34

35  
36 <sup>g</sup> Medical Center of the University of Munich (LMU), Germany  
37

38 <sup>h</sup> Dr von Hauner Childrens' Hospital Medical Center of the University of Munich (LMU),  
39 Germany  
40

41  
42 <sup>i</sup> CIH<sup>LMU</sup>, Center for International Health, University Hospital, LMU Munich, Germany  
43

44 **Corresponding author:** Netsanet Workneh (MD, DTM&H)  
45

46  
47 College of public health and medical sciences, Jimma University, Jimma, Ethiopia  
48

49 PhD candidate, at CIHLMU, Munich, Germany  
50

51 Phone: +251 917762109  
52

53 Email: konetsanet@gmail.com, or Netsanet.Workneh@lrz.uni-muenchen.de  
54

55 **Word count:** 2511  
56  
57



## ABSTRACT

**Purpose:** The aim of this study was to assess morbidity and mortality pattern of small for gestational age (SGA) preterm infants in comparison to appropriate for gestational age (AGA) preterm infants of similar gestational age.

**Method:** We compared neonatal outcomes of 1336, 1:1 matched, singleton SGA and AGA preterm infants based on their gestational age using data from the study “Causes of Illness and Death of Preterm Infants in Ethiopia (SIP)”. Data were analyzed using SPSS version 23. Chi square test, odds ratio and 95 % confidence intervals (95%CI) were done, p-value of <0.05 was considered statistically significant.

**Result:** The majority of the infants 1194 (89%) were moderate to late preterm (32 to 36 weeks of gestation), 763 (57%) were females. Male preterm infants had higher risk of being SGA than female infants, 61.6% versus 41.3%. SGA infants had increased risk of hypoglycemia (OR and 95% CI of 1.6 (1.2-2.0), necrotizing enterocolitis (NEC) 2.3(1.2-4.1), polycythemia 3.0 (1.6-5.4), late onset neonatal sepsis (LOS) 3.6 (1.1-10.9)) and prolonged hospitalization 2.9 (2.0-4.2). The rates of respiratory distress syndrome (RDS), apnea and mortality were similar in the SGA and AGA groups.

**Conclusion:** Neonatal complications such as hypoglycemia, NEC, LOS, polycythemia and prolonged hospitalization are more common in SGA infants; while rates of RDS and mortality are similar in SGA and AGA groups. Early recognition of SGA status, high index of suspicion and screening for complications associated, and timely intervention to prevent complications need due consideration.

## INTRODUCTION

Globally, intrauterine growth restriction (IUGR) occurs in about 24% of newborns per year, and the majority are born in low and middle income countries (LMICs).[1] IUGR is one of the rising public health challenges, because it contributes to increased risk of neonatal morbidity and mortality, and chronic diseases in adulthood.[2-4] Small for gestational age (SGA) is commonly defined as birthweight-for-gestational-age measure below the 10th percentile compared to a gender-specific reference population.[5] IUGR refers to a condition in which the fetal growth is slower than normal, a common cause of SGA; while SGA includes constitutionally small babies. [2] IUGR and SGA can only be distinguished if serial prenatal ultrasound evaluations are done. IUGR occurs due to compromised fetal growth usually related to placental malfunction for various reasons, such as maternal hypertension, diabetes, cardiopulmonary disease, anemia, malnutrition and multiple pregnancies.[6, 7] Congenital malformations and fetal infection may also lead to SGA. IUGR and SGA are commonly used interchangeably and for this paper we will refer to these conditions as SGA.[6]

Conditions, such as multiple pregnancies or pregnancies complicated by maternal hypertension or other placental dysfunction, cause increased secretion of glucocorticoids, other steroid hormones and catecholamines that results in acceleration of brain and lung maturation by as much as 3 to 4 weeks or more when compared to the AGA infants of the same gestational age (GA); this is considered an adaptation to early extrauterine life.[8-10] However, this adaptive

1  
2  
3 response may fail if the placental dysfunction progresses and the fetus experiences severe anoxia  
4 and malnutrition that could result in increased risk of complications and death.[2, 10]  
5  
6

7  
8 Several studies have reported contradictory findings on the effect IUGR on neonatal respiratory  
9 distress syndrome (RDS).[11] The risk of RDS has been reported to be same or lower in SGA  
10 infants compared to AGA infants of similar GA,[12-14] but numerous studies have reported  
11 increased risk of morbidity and mortality in SGA infants.[3,13,15-19  
12  
13  
14  
15  
16  
17

18 The reported conflicting findings of neonatal outcomes of SGA infants could be due to the  
19 differences in the timing of the onset of placental insufficiency, the severity of growth restriction,  
20 and the degree of cardiovascular adaptation [20] Differences in settings of the studies could play  
21 a role in terms of early diagnoses of high risk pregnancies and timely intervention, that could  
22 abort the progression of the insult and prevent complications.  
23  
24  
25  
26  
27  
28  
29  
30

31 SGA infants are at higher risk of metabolic and hematological disturbances and those with severe  
32 SGA are more likely to die during the neonatal period.[10, 18] Those who survive the neonatal  
33 period have a high risk of growth and developmental impairment in childhood, and metabolic,  
34 hormonal and cognitive disorders later in adulthood.[7, 21] Reports from high income countries  
35 show no significant mortality difference between preterm SGA and AGA infants. However, in  
36 LMICs preterm SGA infants have increased risk of mortality. [6] Most of the studies on preterm  
37 infants' health and SGA are reported from high income countries and there is a paucity of data  
38 from LMICs where the burden is very high.[22] The aim of this study is to assess morbidity and  
39 mortality pattern of preterm SGA infants in comparison to AGA infants of similar GA in five  
40 neonatal intensive care units (NICUs) in Ethiopia.  
41  
42  
43  
44  
45  
46  
47  
48  
49  
50  
51  
52  
53  
54  
55  
56  
57  
58  
59  
60

## METHOD

We analyzed maternal obstetric and clinical data of GA matched SGA and AGA preterm infants admitted to neonatal intensive units (NICUs) from a study on Causes of Illness and Death of Preterm Infants in Ethiopia (SIP). SIP was a prospective descriptive multisite hospital-based study conducted in 5 selected hospitals in Ethiopia. The protocol and the primary result have been published.[23, 24]

After exclusion of multiple births, those with congenital malformations and chromosomal disorders and large for gestational age (LGA) infants, SGA infants were identified and 1:1 match with AGA preterm infants was done randomly. Weight for GA was assessed based on gender and GA specific Fenton growth charts.[25] SGA was defined as a birth weight below the 10<sup>th</sup> percentile for GA, and AGA birth weight was defined as between the 10<sup>th</sup> and 90<sup>th</sup> percentile for GA. The association of SGA with gender, mortality, length of hospital stay, clinical diagnoses such as RDS, necrotizing enterocolitis (NEC), neonatal infections, hypoglycemia, perinatal asphyxia and polycythemia were analyzed. Maternal obstetric variables such as maternal age, marital status, pregnancy induced hypertension, premature rupture of membranes (PROM), antepartum hemorrhage, chorioamnionitis, dexamethasone administration and mode of delivery were assessed for association with birth weight for GA.

GA estimation was based on maternal menstrual history, early fetal ultrasound or New Ballard Score examination. Complications of preterm birth such as RDS and neonatal infections were diagnosed based on clinical findings and investigations including chest x-ray, blood culture and white blood cell count. Death before the 28<sup>th</sup> day of life was defined as neonatal mortality.

Statistical Analysis was done using the SPSS statistical program. Differences in association of the variables were analyzed with Chi-square tests and a p-value of <0.05 was considered significant. Odds ratios (OR) and 95% confidence intervals (95% CI) were calculated to identify clinical variables associated with SGA.

Ethical approval was obtained from Addis Ababa University College of health Sciences institutional review board (Ethics ID: AAUMF 03-008) before the study was commenced. The parents of the infants were given adequate information and asked for informed consent prior to participation.

### Patient and Public Involvement statement

Patients were not involved in the design, recruitment and conduct of this study.

### RESULT

A total of 1336 singleton SGA and AGA preterm infants were eligible for the study (Figure1); 763 (57%) were females. The majority of the infants, 1094 (81.9%) were moderate to late preterm (32 to 36 weeks of GA), and 893 (67%) of the infants had a birthweight greater than 1500 grams. The common complications the infants had are shown in table 1.

**Table 1. Preterm infants' perinatal data**

| Variables                   | No (%)     |
|-----------------------------|------------|
| <b>Infants sex</b>          |            |
| Male                        | 573 (42.9) |
| Female                      | 763 (57.1) |
| <b>Birthweight in grams</b> |            |
| <1000                       | 78 (5.8)   |
| 1000 to 1499                | 365 (27.3) |
| 1500 to 1999                | 538 (40.3) |
| ≥2000                       | 355 (26.6) |

| <b>Gestational Age in weeks</b>                    |            |
|----------------------------------------------------|------------|
| 28 to 32                                           | 242 (18.1) |
| 33 to 34                                           | 562 (42.1) |
| 35 to 36                                           | 532 (39.8) |
| <b>Common morbidities</b>                          |            |
| Neonatal infections                                | 696 (52.1) |
| Respiratory distress syndrome                      | 514 (38.5) |
| Hypoglycemia                                       | 326 (24.4) |
| Hyperbilirubinemia                                 | 417 (31.2) |
| Perinatal asphyxia                                 | 98 (7.3)   |
| Polycythemia                                       | 58 (4.3)   |
| <b>Distribution of study subjects by hospitals</b> |            |
| Gondar University hospital                         | 373 (27.9) |
| Saint Paul Millennium College Hospital             | 358 (26.8) |
| Black Lion Hospital                                | 307 (23.0) |
| Ghandi Memorial Hospital.                          | 158 (11.8) |
| Jimma University Medical Center                    | 140 (10.5) |

The proportion of SGA in male infants was higher than female infants of similar GA, 61.6% versus 41.3%, (p-value <.001). Maternal age and marital status were not associated with SGA; while pregnancy induced hypertension had a statistically significant association with SGA. SGA infants were more likely to be delivered by caesarian section than AGA preterm infants, (p-value<.001). Prophylactic dexamethasone was given more often to the mothers of the preterm infants who were SGA, (p-value = .017). Other obstetric factors studied such as PROM, antepartum hemorrhage, and chorioamnionitis were more common in mothers of AGA preterm infants, (p-value <0.01) (Table 2).

**Table 2. Factors associated with birth weight for gestational age.**

| <b>Variables, No (%)</b> | <b>Total</b> | <b>SGA<br/>N=668</b> | <b>AGA<br/>N=668</b> | <b>P-value</b> |
|--------------------------|--------------|----------------------|----------------------|----------------|
| <b>Maternal age</b>      |              |                      |                      | .303           |
| <20 years                | 236 (17.7)   | 115 (17.2)           | 121 (18.1)           |                |
| 20 to 34 years           | 980 (73.4)   | 485 (72.6)           | 495 (74.1)           |                |

|                                      |             |            |            |       |
|--------------------------------------|-------------|------------|------------|-------|
| ≥35 years                            | 120 (9.0)   | 88 (13.2)  | 52 (7.9)   |       |
| <b>Marital Status</b>                |             |            |            | .207  |
| Married                              | 1283 (96.0) | 637 (95.4) | 647 (96.9) |       |
| Single                               | 53 (4.0)    | 31(4.6)    | 21 (3.1)   |       |
| <b>Mode of Delivery</b>              |             |            |            | <.001 |
| Cesarean section                     | 509 (38.1)  | 283 (42.3) | 226 (33.3) |       |
| Vaginal delivery                     | 827 (61.9)  | 385 (57.3) | 442 (66.1) |       |
| <b>Major obstetric complications</b> |             |            |            |       |
| Pregnancy induced hypertension       | 445 (33.3)  | 290 (43.4) | 155 (23.2) | <.001 |
| PROM                                 | 191 (14.4)  | 72 (10.8)  | 120 (17.9) | <.001 |
| Antepartum hemorrhage                | 158 (11.8)  | 63 (9.4)   | 95 (14.2)  | .007  |
| Chorioamnionitis                     | 61 (4.6)    | 14 (2.1)   | 47 (7.0)   | <.001 |
| Mother received dexamethasone        | 435 (32.6)  | 238 (35.6) | 197 (29.5) | .017  |
| <b>Sex of the infant</b>             |             |            |            | <.001 |
| Male                                 | 573 (42.9)  | 353 (61.6) | 220 (38.4) |       |
| Female                               | 763 (57.1)  | 315 (41.3) | 448 (58.7) |       |

AGA= Appropriate for gestational age, SGA = Small for gestational age, PROM= Premature rupture of membranes

The rates of RDS, apnea and mortality were similar among the SGA and AGA groups. While SGA infants had a 1.6 times higher risk of developing hypoglycemia, p-value<.001, OR = 1.58, 95% CI (1.23-2.04). NEC was diagnosed in 5.2% of SGA and 2.4% of AGA infants, p-value =.007, odds ratio = 2.25 95% CI (1.24-4.11). Polycythemia was seen more often in SGA infants, p- value <.001, OR=3.00 95% CI (1.65-5.45). Similar rates of neonatal infections were seen in both groups, while SGA infants had 3.6 times higher risk of developing late onset neonatal sepsis than AGA preterm infants, p-value=.018, OR = 3.55 95%CI (1.16-10.85). SGA infants were more likely to be hospitalized for more than 21 days than AGA preterm infants, p-value<.001, OR=2.90, 95%CI (1.98-4.24) (Table 3).

**Table 3. Comparison of neonatal outcomes of small for gestational age and appropriate for gestational age preterm infants**

| Variables               | SGA<br>(N=668) | AGA<br>(N=668) | P-value | Odds<br>ratio | 95 % CI |       |
|-------------------------|----------------|----------------|---------|---------------|---------|-------|
|                         |                |                |         |               | Lower   | Upper |
| RDS                     | 257 (38.5)     | 257 (38.5)     | 1.00    | 1.00          | .80     | 1.25  |
| Apnea                   | 66 (9.9)       | 54 (8.0)       | .251    | 1.25          | .86     | 1.82  |
| Hypoglycemia            | 191 (28.6)     | 135 (20.2)     | <.001   | 1.58          | 1.23    | 2.04  |
| NEC                     | 35 (5.2)       | 16 (2.4)       | .007    | 2.25          | 1.24    | 4.11  |
| Polycythemia            | 43 (6.4)       | 15 (2.2)       | <.001   | 3.00          | 1.65    | 5.45  |
| EOS                     | 275 (41.2)     | 271 (40.6)     | .824    | 1.03          | .82     | 1.28  |
| LOS                     | 14 (2.1)       | 4 (0.6)        | .018    | 3.55          | 1.16    | 10.85 |
| Hyperbilirubinemia      | 196            | 221            | .140    | .84           | .67     | 1.06  |
| Perinatal asphyxia      | 48             | 50             | .834    | .96           | .63     | 1.44  |
| Mortality               | 51 (7.6)       | 51 (7.6)       | 1.00    | 1.00          | .67     | 1.50  |
| Length of hospital Stay |                |                |         |               |         |       |
| <21 days                | 564 (84.4)     | 628 (94.0)     | -       | -             | -       | -     |
| ≥21days                 | 104 (15.6)     | 40 (6.0)       | <.001   | 2.90          | 2.98    | 4.24  |

AGA= Appropriate for gestational age, SGA = Small for gestational age, RDS = Respiratory distress syndrome, NEC = necrotizing enterocolitis, EOS = Early onset neonatal sepsis, LOS = Late onset neonatal sepsis

## DISCUSSION

Comparison of neonatal outcomes of SGA and AGA preterm infants remains controversial, as several investigators have reported conflicting results. In the current study, the rates of RDS and mortality among the two groups were similar, unlike the 2 to 4 times, [6] and 16 times increased mortality of SGA preterm infants reported from LMICs. [22] The mortality rate in this study



1  
2  
3 could have been partly modified related to the antenatal dexamethasone the SGA groups had  
4 received more than the AGA infants. These findings were in line with the report of Bartal et al  
5  
6 among late preterm neonates.[14] And our findings contradict the reports of Tsai et al. and  
7  
8 Sharma et al, who reported an increased risk of RDS and mortality among SGA infants.[13, 26]  
9  
10 However, Bartels et al and Tyson et al reported increased risk of death and decreased risk of  
11  
12 RDS.[12, 19] The contradicting findings in the literature might be due to the multifactorial nature  
13  
14 of outcome of SGA, the cause of SGA and severity of the condition, duration of intrauterine  
15  
16 hypoxia, and variations in settings of the studies. The GA at birth could modify the physiologic  
17  
18 changes and adaptation to extrauterine environment.  
19  
20  
21  
22  
23  
24

25 The SGA infants were more likely to be delivered by cesarean section (p-value<.001) and their  
26  
27 mothers were given prophylactic dexamethasone more often compared to mothers of AGA  
28  
29 infants (p-value = .017), this may have improved the overall outcome of the SGA infants.  
30  
31

32 Pregnancy induced hypertension was associated with the SGA (p-value <.001) whereas acute  
33  
34 obstetric condition such as antepartum hemorrhage, chorioamnionitis, and PROM were more  
35  
36 common in mothers of AGA infants. This finding is similar to the report of Boghossian et al.[27]  
37  
38  
39

40 The rate of early onset neonatal infection was comparable in both groups, however SGA infants  
41  
42 had a higher risk of late onset neonatal sepsis. Similarly, SGA infants had an increased risk of  
43  
44 NEC and hypoglycemia compared to AGA infants. These findings are consistent with reports of  
45  
46 Hasthi et al. from India and Boghossian et al. from USA.[15, 27] These can likely be explained  
47  
48 by the severe undernutrition the infants experienced predisposing them to infection, although the  
49  
50 mechanisms of how under-nutrition is related to immune suppression is not well understood,  
51  
52 there are strong epidemiologic data supporting the link.[28] The increased risk of NEC might be  
53  
54  
55  
56  
57  
58  
59  
60

1  
2  
3 associated with immature gut development that has resulted from intrauterine chronic fetal  
4 hypoxia and consequent cardiovascular redistribution of blood flow away from the  
5  
6 gastrointestinal tract to vital organs.[29]  
7  
8  
9

10  
11 SGA infants had a statistically significant increased risk of prolonged hospitalization for more  
12 than 21 days, likely related to the severity of the morbidities they had; Sharma et al from USA  
13 reported a similar finding in a retrospective study involving 2,530 infants born at  $\leq 36$  week.[19]  
14  
15 Polycythemia (a venous hematocrit above 65%) can occur as a response to intrauterine hypoxia,  
16 the hyper-viscosity of blood associated might result in serious complications.[30] SGA infants  
17 are at higher risk of developing polycythemia.[2] Similarly, we found a 3-fold increased risk of  
18 polycythemia in SGA compared to AGA infants. The observed complications could be prevented  
19 with improvement of neonatal care.  
20  
21  
22  
23  
24  
25  
26  
27  
28  
29  
30  
31  
32  
33  
34  
35  
36

## 37 CONCLUSION

38  
39  
40 The SGA infants in this study had increased risk of hypoglycemia, NEC, late onset neonatal  
41 sepsis, polycythemia and prolonged hospitalization. The rates of RDS and neonatal mortality  
42 were similar in SGA and AGA infants. Proper antenatal care, timely recognition of high risk  
43 pregnancies and right interventions are needed to prevent IUGR and the subsequent SGA related  
44 complications. Screening for morbidities associated with SGA, preventive measures and  
45 adequate postnatal care could contribute for improvement of neonatal outcomes.  
46  
47  
48  
49  
50  
51  
52  
53  
54  
55  
56  
57  
58  
59  
60

1  
2  
3 **ACKNOWLEDGMENTS:** We would like to thank Bill and Melinda Gates foundation for  
4 funding the SIP study. Our special appreciation goes to all families who participated in the study  
5 and all health care workers in the five hospitals who helped us in data collection and completion  
6 of the study. And Assistance provided by administrators of neonatal intensive care units and  
7 hospital managers was greatly appreciated.  
8  
9  
10  
11  
12  
13

14  
15 **COMPETING INTERESTS:** The Authors declare that there is no conflict of interest.  
16  
17

18 **FUNDING:** The study was funded by Bill and Melinda Gates foundation, grant number:  
19 OPP1136965.  
20  
21  
22

23  
24 **CONTRIBUTORSHIP STATEMENT:**  
25

26  
27 The primary study from which the data was extracted “Causes of Illness and Death of Preterm  
28 Infants in Ethiopia (SIP)” was conceptualized and designed by AKN and LMM; data collection  
29 was monitored by LMM, BW, EMM, AM and RLG. NWG analyzed the data and drafted the  
30 manuscript and RLG, AKN, EMM, AM, BW, MS, OG and LMM contributed in the writing and  
31 reviewing the manuscript. All authors have revised the work critically and approved the final  
32 manuscript as submitted.  
33  
34  
35  
36  
37  
38  
39  
40  
41  
42  
43  
44  
45  
46  
47  
48  
49  
50  
51  
52  
53  
54  
55  
56  
57  
58  
59  
60

### What is already known on this topic?

Intrauterine growth restriction is one of the common perinatal complications associated with increased neonatal morbidity and mortality. As an adaptation to early extrauterine life, in utero stress associated with placental insufficiency increases secretion of steroid hormones in the fetus. This results in acceleration of brain and lung maturation, however several studies have reported contradictory findings on the morbidity and mortality patterns of SGA infants.

### What this study adds?

Accelerated maturity associated with intrauterine growth restriction expected in SGA preterm infants did not protect them from RDS and mortality. Rather, SGA infants have significantly increased risk of hypoglycemia, necrotizing enterocolitis, polycythemia, late onset neonatal sepsis and prolonged hospitalization.

### REFERENCES

1. De Onis M, Blössner M, Villar JO. Levels and patterns of intrauterine growth retardation in developing countries. *Eur J Clin Nutr* 1998;52:S5.
2. Colella M, Frérot A, Novais ARB, et al. Neonatal and Long-Term Consequences of Fetal Growth Restriction. *Curr Pediatr Rev* 2018;14:212–218.
3. Engineer N, Kumar S. Perinatal variables and neonatal outcomes in severely growth restricted preterm fetuses. *Acta Obstet Gynecol Scand* 2010;89:1174–1181.
4. Garite TJ, Clark R, Thorp JA. Intrauterine growth restriction increases morbidity and mortality among premature neonates. *Am J Obstet Gynecol. Journal* 2004;191:481–487.

- 1  
2  
3 5. Physical status: the use and interpretation of anthropometry. Report of a WHO Expert  
4  
5 Committee. *World Health Organ Tech Rep Ser* 1995;854:1–452.
- 6  
7  
8 6. Ota E, Ganchimeg T, Morisaki N, et al. WHO Multi-Country Survey on Maternal and  
9  
10 Newborn Health Research Network. Risk factors and adverse perinatal outcomes among  
11  
12 term and preterm infants born small-for-gestational-age: secondary analyses of the WHO  
13  
14 Multi-Country Survey on Maternal and Newborn Health. *PLoS One* 2014;9(8).
- 15  
16  
17 7. Suhag A, Berghella V. Intrauterine growth restriction (IUGR): etiology and diagnosis.  
18  
19 *Current Obstetrics and Gynecology Reports* 2013;2:102–111.
- 20  
21  
22 8. Amiel-Tison C, Cabrol D, Denver R, et al. Fetal adaptation to stress: Part I: Acceleration  
23  
24 of fetal maturation and earlier birth triggered by placental insufficiency in humans. *Early*  
25  
26 *Hum Dev* 2004;78:15–27.
- 27  
28  
29 9. Nobile S, Marchionni P, Carnielli VP. Neonatal outcome of small for gestational age  
30  
31 preterm infants. *Eur J Pediatr* 2017;176:1083–1088.
- 32  
33  
34 10. Amiel-Tison C, Pettigrew AG. Adaptive changes in the developing brain during  
35  
36 intrauterine stress. *BRAIN DEV JPN* 1991;13:67–76.
- 37  
38  
39 11. Arigliani M, Spinelli AM, Liguoro I, et al. Nutrition and Lung Growth. *Nutrients*  
40  
41 2018;10:919.
- 42  
43  
44 12. Bartels DB, Kreienbrock L, Dammann O, et al. Population based study on the outcome of  
45  
46 small for gestational age newborns. *Arch Dis Child Fetal Neonatal Ed* 2005;90:F53–9.
- 47  
48  
49 13. Tsai LY, Chen YL, Tsou KI, et al. Taiwan Premature Infant Developmental  
50  
51 Collaborative Study Group. The impact of small-for-gestational-age on neonatal outcome  
52  
53 among very-low-birth-weight infants. *Pediatr Neonatol* 2015;56:10110–7.
- 54  
55  
56  
57  
58  
59  
60

- 1  
2  
3 14. Fishel Bartal M, Chen HY, Blackwell SC, et al. Neonatal morbidity in late preterm small  
4  
5 for gestational age neonates. *J Matern Fetal Neonatal Med* 2019 23:1–6.  
6  
7
- 8 15. Hasthi UR, Ashwani N, Kumar CS, et al. Morbidity and Mortality Patterns in Small for  
9  
10 Gestational Age versus Appropriate for Gestational Age Preterm Neonates Admitted in  
11  
12 Level II Neonatal Intensive Care Unit: A Observational Study. *Int J Sci Study*  
13  
14 2017;4:133–136.  
15  
16  
17
- 18 16. Simchen MJ, Beiner ME, Strauss-Liviathan N, et al. Neonatal outcome in growth-  
19  
20 restricted versus appropriately grown preterm infants. *Am J Perinatol* 2000;17(04):187–  
21  
22 192.  
23  
24  
25
- 26 17. Giapros V, Drougia A, Krallis N, et al. Morbidity and mortality patterns in small-for-  
27  
28 gestational age infants born preterm. *J Matern Fetal Neonatal Med* 2012;25:153–157.  
29  
30
- 31 18. Qiu X, Lodha A, Shah PS, et al. Canadian Neonatal Network. Neonatal outcomes of  
32  
33 small for gestational age preterm infants in Canada. *Am. J. Perinatol* 2012 ;29:87–94.  
34  
35
- 36 19. Sharma P, McKay K, Rosenkrantz TS, et al. Comparisons of mortality and pre-discharge  
37  
38 respiratory outcomes in small-for-gestational-age and appropriate-for-gestational-age  
39  
40 premature infants. *BMC Pediatr* 2004;4:9.  
41
- 42 20. Malhotra A, Allison BJ, Jenkin G, et al. Neonatal morbidities of fetal growth restriction:  
43  
44 pathophysiology and impact. *Front Endocrinol* 2019;10:55.  
45  
46
- 47 21. Longo S, Bollani L, Decembrino L, et al. Short-term and long-term sequelae in  
48  
49 intrauterine growth retardation (IUGR). *J Matern Fetal Neonatal Med* 2013;26:222–225.  
50  
51  
52  
53  
54  
55  
56  
57  
58  
59  
60

- 1  
2  
3 22. Katz J, Lee AC, Kozuki N, et al. Mortality risk in preterm and small-for-gestational-age  
4 infants in low-income and middle-income countries: a pooled country analysis. *Lancet*  
5 2013;382:417–25.  
6  
7  
8  
9  
10 23. Muhe LM, McClure EM, Mekasha A, et al. A prospective study of causes of illness and  
11 death in preterm infants in Ethiopia: the SIP study protocol. *Reprod. Health* 2018  
12 ;15:116.  
13  
14  
15  
16  
17 24. Muhe LM, McClure EM, Nigussie AK, et al. Major causes of death in preterm infants in  
18 selected hospitals in Ethiopia (SIP): a prospective, cross-sectional, observational study.  
19 *Lancet Glob Health* 2019 ;7:e1130-8.  
20  
21  
22  
23  
24 25. Fenton TR, Kim JH. A systematic review and meta-analysis to revise the Fenton growth  
25 chart for preterm infants. *BMC Pediatr* 2013;13:59.  
26  
27  
28  
29 26. Tyson JE, Kennedy K, Broyles S, et al. The small for gestational age infant: accelerated  
30 or delayed pulmonary maturation? Increased or decreased survival?. *Pediatrics*  
31 1995;95:534–538.  
32  
33  
34  
35 27. Boghossian NS, Geraci M, Edwards EM, et al. Morbidity and mortality in small for  
36 gestational age infants at 22 to 29 weeks' gestation. *Pediatrics* 2018;141:e20172533.  
37  
38  
39  
40 28. Jones KD, Berkley JA, Warner JO. Perinatal nutrition and immunity to infection. *Pediatr*  
41 *Allergy Immunol* 2010;21:564–576.  
42  
43  
44  
45 29. Bozzetti V, Tagliabue PE. Enteral feeding of intrauterine growth restriction preterm  
46 infants: theoretical risks and practical implications. *Pediatr Med Chir* 2017;39:160  
47  
48  
49 30. Sarkar S, Rosenkrantz TS. Neonatal polycythemia and hyperviscosity. *Semin Fetal*  
50 *Neonatal Med* 2008;13:248–255  
51  
52  
53  
54  
55  
56  
57  
58  
59  
60

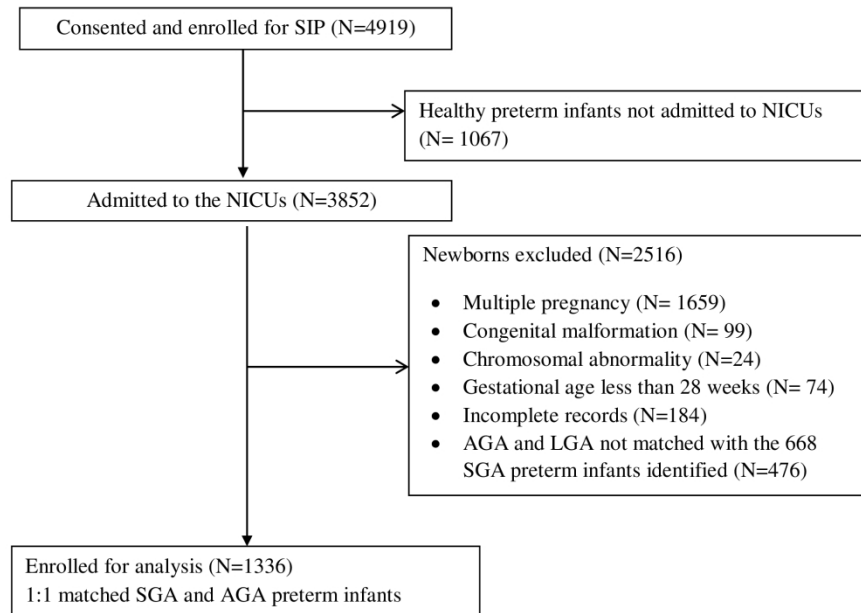



# BMJ Paediatrics Open

## Comparison of neonatal outcomes of small for gestational age and appropriate for gestational age preterm infants born at 28 to 36 weeks of gestation, a multicenter study in Ethiopia

|                               |                                                                                                                                                                                                                                                                                                                                                                                                                                                                                                                                                                                                                                                                                                   |
|-------------------------------|---------------------------------------------------------------------------------------------------------------------------------------------------------------------------------------------------------------------------------------------------------------------------------------------------------------------------------------------------------------------------------------------------------------------------------------------------------------------------------------------------------------------------------------------------------------------------------------------------------------------------------------------------------------------------------------------------|
| Journal:                      | <i>BMJ Paediatrics Open</i>                                                                                                                                                                                                                                                                                                                                                                                                                                                                                                                                                                                                                                                                       |
| Manuscript ID                 | bmjpo-2020-000740.R2                                                                                                                                                                                                                                                                                                                                                                                                                                                                                                                                                                                                                                                                              |
| Article Type:                 | Original research                                                                                                                                                                                                                                                                                                                                                                                                                                                                                                                                                                                                                                                                                 |
| Date Submitted by the Author: | 08-Aug-2020                                                                                                                                                                                                                                                                                                                                                                                                                                                                                                                                                                                                                                                                                       |
| Complete List of Authors:     | Gidi, Netsanet; Jimma University College of Public Health and Medical Sciences, Pediatric and child health; Ludwig-Maximilians-Universitat Munchen Center for International Health Goldenberg , Robert L. ; Columbia University Nigussie, Assaye K. ; Bill and Melinda Gates Foundation McClure, Elizabeth; RTI International Mekasha, Amha; Addis Ababa University College of Health Sciences Worku, Bogale; Ethiopian Pediatric Society Siebeck, Matthias; Medical Center of the University of Munich (LMU) Genzel-Boroviczeny, Orsolya; Ludwig Maximilian University of Munich , Dr. von Hauner University Children's Hospital Muhe, Lulu M; Addis Ababa University College of Health Sciences |
| Keywords:                     | Neonatology, Mortality                                                                                                                                                                                                                                                                                                                                                                                                                                                                                                                                                                                                                                                                            |
|                               |                                                                                                                                                                                                                                                                                                                                                                                                                                                                                                                                                                                                                                                                                                   |

SCHOLARONE™  
Manuscripts



I, the Submitting Author has the right to grant and does grant on behalf of all authors of the Work (as defined in the below author licence), an exclusive licence and/or a non-exclusive licence for contributions from authors who are: i) UK Crown employees; ii) where BMJ has agreed a CC-BY licence shall apply, and/or iii) in accordance with the terms applicable for US Federal Government officers or employees acting as part of their official duties; on a worldwide, perpetual, irrevocable, royalty-free basis to BMJ Publishing Group Ltd ("BMJ") its licensees and where the relevant Journal is co-owned by BMJ to the co-owners of the Journal, to publish the Work in this journal and any other BMJ products and to exploit all rights, as set out in our [licence](#).

The Submitting Author accepts and understands that any supply made under these terms is made by BMJ to the Submitting Author unless you are acting as an employee on behalf of your employer or a postgraduate student of an affiliated institution which is paying any applicable article publishing charge ("APC") for Open Access articles. Where the Submitting Author wishes to make the Work available on an Open Access basis (and intends to pay the relevant APC), the terms of reuse of such Open Access shall be governed by a Creative Commons licence – details of these licences and which [Creative Commons](#) licence will apply to this Work are set out in our licence referred to above.

Other than as permitted in any relevant BMJ Author's Self Archiving Policies, I confirm this Work has not been accepted for publication elsewhere, is not being considered for publication elsewhere and does not duplicate material already published. I confirm all authors consent to publication of this Work and authorise the granting of this licence.

1  
2  
3 **Title: Comparison of neonatal outcomes of small for gestational age and appropriate for**  
4 **gestational age preterm infants born at 28 to 36 weeks of gestation, a multicenter study in**  
5  
6  
7 **Ethiopia**

8  
9  
10 **Authors:** Netsanet Workneh Gidi<sup>a,i</sup>, Robert L. Goldenberg<sup>b</sup>, Assaye K. Nigussie<sup>c</sup>, Elizabeth M.  
11  
12 McClure<sup>d</sup>, Amha Mekasha<sup>e</sup>, Bogale Worku<sup>f</sup>, Matthias Siebeck<sup>g</sup>, Orsolya Genzel-Boroviczény<sup>h</sup>,  
13  
14 Lulu M. Muhe<sup>e</sup>  
15  
16

17  
18 **Affiliations**  
19

20  
21  
22 <sup>a</sup> Institute of Health Sciences, Jimma University, Jimma, Ethiopia  
23

24 <sup>b</sup> Columbia University, New York, NY, USA  
25

26 <sup>c</sup> Bill and Melinda Gates Foundation, Seattle, WA, USA  
27

28  
29 <sup>d</sup> RTI International, 3040 Cornwallis Rd., Durham, NC, 27709, USA  
30

31 <sup>e</sup> College of Health Sciences, Addis Ababa University, Addis Ababa, Ethiopia  
32

33 <sup>f</sup> Ethiopian Pediatric Society, Addis Ababa, Ethiopia  
34

35 <sup>g</sup> Medical Center of the University of Munich (LMU), Germany  
36

37  
38 <sup>h</sup> Dr von Hauner Childrens' Hospital Medical Center of the University of Munich (LMU),  
39 Germany  
40

41  
42 <sup>i</sup> CIH<sup>LMU</sup>, Center for International Health, University Hospital, LMU Munich, Germany  
43

44 **Corresponding author:** Netsanet Workneh (MD, DTM&H)  
45

46  
47 College of public health and medical sciences, Jimma University, Jimma, Ethiopia  
48

49 PhD candidate, at CIHLMU, Munich, Germany  
50

51 Phone: +251 917762109  
52

53 Email: konetsanet@gmail.com, or Netsanet.Workneh@lrz.uni-muenchen.de  
54

55 **Word count:** 2506  
56  
57

## ABSTRACT

**Purpose:** The aim of this study was to assess morbidity and mortality pattern of small for gestational age (SGA) preterm infants in comparison to appropriate for gestational age (AGA) preterm infants of similar gestational age.

**Method:** We compared neonatal outcomes of 1336, 1:1 matched, singleton SGA and AGA preterm infants based on their gestational age using data from the study “Causes of Illness and Death of Preterm Infants in Ethiopia (SIP)”. Data were analyzed using SPSS version 23. Chi square test, odds ratio and 95 % confidence intervals (95%CI) were done, p-value of <0.05 was considered statistically significant.

**Result:** The majority of the infants 1194 (89%) were moderate to late preterm (32 to 36 weeks of gestation), 763 (57%) were females. Male preterm infants had higher risk of being SGA than female infants (p-value <0.001).SGA infants had increased risk of hypoglycemia (OR and 95% CI of 1.6 (1.2-2.0), necrotizing enterocolitis (NEC) 2.3(1.2-4.1), polycythemia 3.0 (1.6-5.4), late onset neonatal sepsis (LOS) 3.6 (1.1-10.9)) and prolonged hospitalization 2.9 (2.0-4.2). The rates of respiratory distress syndrome (RDS), apnea and mortality were similar in the SGA and AGA groups.

**Conclusion:** Neonatal complications such as hypoglycemia, NEC, LOS, polycythemia and prolonged hospitalization are more common in SGA infants; while rates of RDS and mortality are similar in SGA and AGA groups. Early recognition of SGA status, high index of suspicion and screening for complications associated, and timely intervention to prevent complications need due consideration.

## INTRODUCTION

Globally, intrauterine growth restriction (IUGR) occurs in about 24% of newborns per year, and the majority are born in low and middle income countries (LMICs).[1] IUGR is one of the rising public health challenges, because it contributes to increased risk of neonatal morbidity and mortality, and chronic diseases in adulthood.[2-4] Small for gestational age (SGA) is commonly defined as birthweight-for-gestational-age measure below the 10th percentile compared to a gender-specific reference population.[5] IUGR refers to a condition in which the fetal growth is slower than normal, a common cause of SGA; while SGA includes constitutionally small babies. [2] IUGR and SGA can only be distinguished if serial prenatal ultrasound evaluations are done. IUGR occurs due to compromised fetal growth usually related to placental malfunction for various reasons, such as maternal hypertension, diabetes, cardiopulmonary disease, anemia, malnutrition and multiple pregnancies.[6, 7] Congenital malformations and fetal infection may also lead to SGA. IUGR and SGA are commonly used interchangeably and for this paper we will refer to these conditions as SGA.[6]

Conditions, such as multiple pregnancies or pregnancies complicated by maternal hypertension or other placental dysfunction, cause increased secretion of glucocorticoids, other steroid hormones and catecholamines that results in acceleration of brain and lung maturation by as much as 3 to 4 weeks or more when compared to the AGA infants of the same gestational age (GA); this is considered an adaptation to early extrauterine life.[8-10] However, this adaptive

1  
2  
3 response may fail if the placental dysfunction progresses and the fetus experiences severe anoxia  
4 and malnutrition that could result in increased risk of complications and death.[2, 10]  
5  
6

7  
8 Several studies have reported contradictory findings on the effect IUGR on neonatal respiratory  
9 distress syndrome (RDS).[11] The risk of RDS has been reported to be same or lower in SGA  
10 infants compared to AGA infants of similar GA,[12-14] but numerous studies have reported  
11 increased risk of morbidity and mortality in SGA infants.[3,13,15-19  
12  
13  
14  
15  
16  
17

18 The reported conflicting findings of neonatal outcomes of SGA infants could be due to the  
19 differences in the timing of the onset of placental insufficiency, the severity of growth restriction,  
20 and the degree of cardiovascular adaptation [20] Differences in settings of the studies could play  
21 a role in terms of early diagnoses of high risk pregnancies and timely intervention, that could  
22 abort the progression of the insult and prevent complications.  
23  
24  
25  
26  
27  
28  
29  
30

31 SGA infants are at higher risk of metabolic and hematological disturbances and those with severe  
32 SGA are more likely to die during the neonatal period.[10, 18] Those who survive the neonatal  
33 period have a high risk of growth and developmental impairment in childhood, and metabolic,  
34 hormonal and cognitive disorders later in adulthood.[7, 21] Reports from high income countries  
35 show no significant mortality difference between preterm SGA and AGA infants. However, in  
36 LMICs preterm SGA infants have increased risk of mortality. [6] Most of the studies on preterm  
37 infants' health and SGA are reported from high income countries and there is a paucity of data  
38 from LMICs where the burden is very high.[22] The aim of this study is to assess morbidity and  
39 mortality pattern of preterm SGA infants in comparison to AGA infants of similar GA in five  
40 neonatal intensive care units (NICUs) in Ethiopia.  
41  
42  
43  
44  
45  
46  
47  
48  
49  
50  
51  
52  
53  
54  
55  
56  
57  
58  
59  
60

## METHOD

We analyzed maternal obstetric and clinical data of GA matched SGA and AGA preterm infants admitted to neonatal intensive units (NICUs) from a study on Causes of Illness and Death of Preterm Infants in Ethiopia (SIP). SIP was a prospective descriptive multisite hospital-based study conducted in 5 selected hospitals in Ethiopia. The protocol and the primary result have been published.[23, 24]

After exclusion of multiple births, those with congenital malformations and chromosomal disorders and large for gestational age (LGA) infants, SGA infants were identified and 1:1 match with AGA preterm infants was done randomly. Weight for GA was assessed based on gender and GA specific Fenton growth charts.[25] SGA was defined as a birth weight below the 10<sup>th</sup> percentile for GA, and AGA birth weight was defined as between the 10<sup>th</sup> and 90<sup>th</sup> percentile for GA. The association of SGA with gender, mortality, length of hospital stay, clinical diagnoses such as RDS, necrotizing enterocolitis (NEC), neonatal infections, hypoglycemia, perinatal asphyxia and polycythemia were analyzed. Maternal obstetric variables such as maternal age, marital status, pregnancy induced hypertension, premature rupture of membranes (PROM), antepartum hemorrhage, chorioamnionitis, dexamethasone administration and mode of delivery were assessed for association with birth weight for GA.

GA estimation was based on maternal menstrual history, early fetal ultrasound or New Ballard Score examination. Complications of preterm birth such as RDS and neonatal infections were diagnosed based on clinical findings and investigations including chest x-ray, blood culture and white blood cell count. Death before the 28<sup>th</sup> day of life was defined as neonatal mortality.

1  
2  
3 Statistical Analysis was done using the SPSS statistical program. Differences in association of  
4 the variables were analyzed with Chi-square tests and a p-value of <0.05 was considered  
5 significant. Odds ratios (OR) and 95% confidence intervals (95% CI) were calculated to identify  
6 clinical variables associated with SGA.  
7  
8  
9  
10  
11

12  
13 Ethical approval was obtained from Addis Ababa University College of health Sciences  
14 institutional review board (Ethics ID: AAUMF 03-008) before the study was commenced. The  
15 parents of the infants were given adequate information and asked for informed consent prior to  
16 participation.  
17  
18  
19  
20  
21  
22

### 23 **Patient and Public Involvement statement**

24  
25  
26 Patients were not involved in the design, recruitment and conduct of this study.  
27  
28

### 29 **RESULT**

30  
31  
32 A total of 1336 singleton SGA and AGA preterm infants were eligible for the study (Figure1);  
33 763 (57%) were females. The majority of the infants, 1094 (81.9%) were moderate to late  
34 preterm (32 to 36 weeks of GA), and 893 (67%) of the infants had a birthweight greater than  
35 1500 grams. The common complications the infants had are shown in table 1.  
36  
37  
38  
39  
40  
41  
42  
43  
44  
45  
46  
47  
48  
49  
50  
51  
52  
53  
54  
55  
56  
57  
58  
59  
60



**Table 1. Preterm infants' perinatal data**

| Variables                                          | No (%)     |
|----------------------------------------------------|------------|
| <b>Infants sex</b>                                 |            |
| Male                                               | 573 (42.9) |
| Female                                             | 763 (57.1) |
| <b>Birthweight in grams</b>                        |            |
| <1000                                              | 78 (5.8)   |
| 1000 to 1499                                       | 365 (27.3) |
| 1500 to 1999                                       | 538 (40.3) |
| ≥2000                                              | 355 (26.6) |
| <b>Gestational Age in weeks</b>                    |            |
| 28 to 32                                           | 242 (18.1) |
| 33 to 34                                           | 562 (42.1) |
| 35 to 36                                           | 532 (39.8) |
| <b>Common morbidities</b>                          |            |
| Neonatal infections                                | 696 (52.1) |
| Respiratory distress syndrome                      | 514 (38.5) |
| Hypoglycemia                                       | 326 (24.4) |
| Hyperbilirubinemia                                 | 417 (31.2) |
| Perinatal asphyxia                                 | 98 (7.3)   |
| Polycythemia                                       | 58 (4.3)   |
| <b>Distribution of study subjects by hospitals</b> |            |
| Gondar University hospital                         | 373 (27.9) |
| Saint Paul Millennium College Hospital             | 358 (26.8) |
| Black Lion Hospital                                | 307 (23.0) |
| Ghandi Memorial Hospital.                          | 158 (11.8) |
| Jimma University Medical Center                    | 140 (10.5) |

The male preterm infants had a higher risk of SGA than female infants (p-value <0.001)..

Maternal age and marital status were not associated with SGA; while pregnancy induced hypertension had a statistically significant association with SGA. SGA infants were more likely to be delivered by caesarian section than AGA preterm infants, (p-value<.001).

Prophylactic dexamethasone was given more often to the mothers of the preterm infants who were SGA, (p-value = .017). Other obstetric factors studied such as PROM, antepartum

hemorrhage, and chorioamnionitis were more common in mothers of AGA preterm infants, (p-value <0.01) (Table 2).

**Table 2. Factors associated with birth weight for gestational age.**

| Variables, No (%)                    | Total       | SGA<br>N=668 | AGA<br>N=668 | P-value |
|--------------------------------------|-------------|--------------|--------------|---------|
| <b>Maternal age</b>                  |             |              |              | .303    |
| <20 years                            | 236 (17.7)  | 115 (17.2)   | 121 (18.1)   |         |
| 20 to 34 years                       | 980 (73.4)  | 485 (72.6)   | 495 (74.1)   |         |
| ≥35 years                            | 120 (9.0)   | 88 (13.2)    | 52 (7.9)     |         |
| <b>Marital Status</b>                |             |              |              | .207    |
| Married                              | 1283 (96.0) | 637 (95.4)   | 647 (96.9)   |         |
| Single                               | 53 (4.0)    | 31(4.6)      | 21 (3.1)     |         |
| <b>Mode of Delivery</b>              |             |              |              | <.001   |
| Cesarean section                     | 509 (38.1)  | 283 (42.3)   | 226 (33.3)   |         |
| Vaginal delivery                     | 827 (61.9)  | 385 (57.3)   | 442 (66.1)   |         |
| <b>Major obstetric complications</b> |             |              |              |         |
| Pregnancy induced hypertension       | 445 (33.3)  | 290 (43.4)   | 155 (23.2)   | <.001   |
| PROM                                 | 191 (14.4)  | 72 (10.8)    | 120 (17.9)   | <.001   |
| Antepartum hemorrhage                | 158 (11.8)  | 63 (9.4)     | 95 (14.2)    | .007    |
| Chorioamnionitis                     | 61 (4.6)    | 14 (2.1)     | 47 (7.0)     | <.001   |
| Mother received dexamethasone        | 435 (32.6)  | 238 (35.6)   | 197 (29.5)   | .017    |
| <b>Sex of the infant</b>             |             |              |              | <.001   |
| Male                                 | 573 (42.9)  | 353 (52.8)   | 220 (32.9)   |         |
| Female                               | 763 (57.1)  | 315 (47.2)   | 448 (67.1)   |         |

AGA= Appropriate for gestational age, SGA = Small for gestational age, PROM= Premature rupture of membranes

The rates of RDS, apnea and mortality were similar among the SGA and AGA groups. While SGA infants had a 1.6 times higher risk of developing hypoglycemia, p-value<.001, OR = 1.58, 95% CI (1.23-2.04). NEC was diagnosed in 5.2% of SGA and 2.4% of AGA infants, p-value

=.007, odds ratio = 2.25 95% CI (1.24-4.11). Polycythemia was seen more often in SGA infants, p-value <.001, OR=3.00 95% CI (1.65-5.45). Similar rates of neonatal infections were seen in both groups, while SGA infants had 3.6 times higher risk of developing late onset neonatal sepsis than AGA preterm infants, p-value=.018, OR = 3.55 95%CI (1.16-10.85). SGA infants were more likely to be hospitalized for more than 21 days than AGA preterm infants, p-value<.001, OR=2.90, 95%CI (1.98-4.24) (Table 3).

**Table 3. Comparison of neonatal outcomes of small for gestational age and appropriate for gestational age preterm infants**

| Variables               | SGA<br>(N=668) | AGA<br>(N=668) | P-value | Odds<br>ratio | 95 % CI |       |
|-------------------------|----------------|----------------|---------|---------------|---------|-------|
|                         |                |                |         |               | Lower   | Upper |
| RDS                     | 257 (38.5)     | 257 (38.5)     | 1.00    | 1.00          | .80     | 1.25  |
| Apnea                   | 66 (9.9)       | 54 (8.0)       | .251    | 1.25          | .86     | 1.82  |
| Hypoglycemia            | 191 (28.6)     | 135 (20.2)     | <.001   | 1.58          | 1.23    | 2.04  |
| NEC                     | 35 (5.2)       | 16 (2.4)       | .007    | 2.25          | 1.24    | 4.11  |
| Polycythemia            | 43 (6.4)       | 15 (2.2)       | <.001   | 3.00          | 1.65    | 5.45  |
| EOS                     | 275 (41.2)     | 271 (40.6)     | .824    | 1.03          | .82     | 1.28  |
| LOS                     | 14 (2.1)       | 4 (0.6)        | .018    | 3.55          | 1.16    | 10.85 |
| Hyperbilirubinemia      | 196            | 221            | .140    | .84           | .67     | 1.06  |
| Perinatal asphyxia      | 48             | 50             | .834    | .96           | .63     | 1.44  |
| Mortality               | 51 (7.6)       | 51 (7.6)       | 1.00    | 1.00          | .67     | 1.50  |
| Length of hospital Stay |                |                |         |               |         |       |
| <21 days                | 564 (84.4)     | 628 (94.0)     | -       | -             | -       | -     |
| ≥21days                 | 104 (15.6)     | 40 (6.0)       | <.001   | 2.90          | 2.98    | 4.24  |

AGA= Appropriate for gestational age, SGA = Small for gestational age, RDS = Respiratory distress syndrome, NEC = necrotizing enterocolitis, EOS = Early onset neonatal sepsis, LOS = Late onset neonatal sepsis

## DISCUSSION

Comparison of neonatal outcomes of SGA and AGA preterm infants remains controversial, as several investigators have reported conflicting results. In the current study, the rates of RDS and mortality among the two groups were similar, unlike the 2 to 4 times, [6] and 16 times increased mortality of SGA preterm infants reported from LMICs. [22] The mortality rate in this study could have been partly modified related to the antenatal dexamethasone the SGA groups had received more than the AGA infants. These findings were in line with the report of Bartal et al among late preterm neonates.[14] And our findings contradict the reports of Tsai et al. and Sharma et al, who reported an increased risk of RDS and mortality among SGA infants.[13, 26] However, Bartels et al and Tyson et al reported increased risk of death and decreased risk of RDS.[12, 19] The contradicting findings in the literature might be due to the multifactorial nature of outcome of SGA, the cause of SGA and severity of the condition, duration of intrauterine hypoxia, and variations in settings of the studies. The GA at birth could modify the physiologic changes and adaptation to extrauterine environment.

The SGA infants were more likely to be delivered by cesarean section (p-value<.001) and their mothers were given prophylactic dexamethasone more often compared to mothers of AGA infants (p-value = .017), this may have improved the overall outcome of the SGA infants. Pregnancy induced hypertension was associated with the SGA (p-value <.001) whereas acute obstetric condition such as antepartum hemorrhage, chorioamnionitis, and PROM were more common in mothers of AGA infants. This finding is similar to the report of Boghossian et al.[27] The rate of early onset neonatal infection was comparable in both groups, however SGA infants had a higher risk of late onset neonatal sepsis. Similarly, SGA infants had an increased risk of

1  
2  
3 NEC and hypoglycemia compared to AGA infants. These findings are consistent with reports of  
4  
5 Hasthi et al. from India and Boghossian et al. from USA.[15, 27] These can likely be explained  
6  
7 by the severe undernutrition the infants experienced predisposing them to infection, although the  
8  
9 mechanisms of how under-nutrition is related to immune suppression is not well understood,  
10  
11 there are strong epidemiologic data supporting the link.[28] The increased risk of NEC might be  
12  
13 associated with immature gut development that has resulted from intrauterine chronic fetal  
14  
15 hypoxia and consequent cardiovascular redistribution of blood flow away from the  
16  
17 gastrointestinal tract to vital organs.[29]  
18  
19  
20  
21  
22

23 SGA infants had a statistically significant increased risk of prolonged hospitalization for more  
24  
25 than 21 days, likely related to the severity of the morbidities they had; Sharma et al from USA  
26  
27 reported a similar finding in a retrospective study involving 2,530 infants born at  $\leq 36$  week.[19]  
28  
29 Polycythemia (a venous hematocrit above 65%) can occur as a response to intrauterine hypoxia,  
30  
31 the hyper-viscosity of blood associated might result in serious complications.[30] SGA infants  
32  
33 are at higher risk of developing polycythemia.[2] Similarly, we found a 3-fold increased risk of  
34  
35 polycythemia in SGA compared to AGA infants. The observed complications could be prevented  
36  
37 with improvement of neonatal care.  
38  
39  
40  
41

## 42 **CONCLUSION**

43  
44  
45 The SGA infants in this study had increased risk of hypoglycemia, NEC, late onset neonatal  
46  
47 sepsis, polycythemia and prolonged hospitalization. The rates of RDS and neonatal mortality  
48  
49 were similar in SGA and AGA infants. Proper antenatal care, timely recognition of high risk  
50  
51 pregnancies and right interventions are needed to prevent IUGR and the subsequent SGA related  
52  
53  
54  
55  
56  
57  
58  
59  
60

1  
2  
3 complications. Screening for morbidities associated with SGA, preventive measures and  
4  
5 adequate postnatal care could contribute for improvement of neonatal outcomes.  
6  
7

8 **ACKNOWLEDGMENTS:** We would like to thank Bill and Melinda Gates foundation for  
9  
10 funding the SIP study. Our special appreciation goes to all families who participated in the study  
11  
12 and all health care workers in the five hospitals who helped us in data collection and completion  
13  
14 of the study. And Assistance provided by administrators of neonatal intensive care units and  
15  
16 hospital managers was greatly appreciated.  
17  
18

19  
20  
21 **COMPETING INTERESTS:** The Authors declare that there is no conflict of interest.  
22  
23

24 **FUNDING:** The study was funded by Bill and Melinda Gates foundation, grant number:  
25  
26 OPP1136965.  
27  
28

29 **CONTRIBUTORSHIP STATEMENT:**  
30

31  
32 The primary study from which the data was extracted “Causes of Illness and Death of Preterm  
33  
34 Infants in Ethiopia (SIP)” was conceptualized and designed by AKN and LMM; data collection  
35  
36 was monitored by LMM, BW, EMM, AM and RLG. NWG analyzed the data and drafted the  
37  
38 manuscript and RLG, AKN, EMM, AM, BW, MS, OG and LMM contributed in the writing and  
39  
40 reviewing the manuscript. All authors have revised the work critically and approved the final  
41  
42 manuscript as submitted.  
43  
44  
45  
46  
47  
48  
49  
50  
51  
52  
53  
54  
55  
56  
57  
58  
59  
60

### What is already known on this topic?

Intrauterine growth restriction is one of the common perinatal complications associated with increased neonatal morbidity and mortality. As an adaptation to early extrauterine life, in utero stress associated with placental insufficiency increases secretion of steroid hormones in the fetus. This results in acceleration of brain and lung maturation, however several studies have reported contradictory findings on the morbidity and mortality patterns of SGA infants.

### What this study adds?

Accelerated maturity associated with intrauterine growth restriction expected in SGA preterm infants did not protect them from RDS and mortality. Rather, SGA infants have significantly increased risk of hypoglycemia, necrotizing enterocolitis, polycythemia, late onset neonatal sepsis and prolonged hospitalization.

### REFERENCES

1. De Onis M, Blössner M, Villar JO. Levels and patterns of intrauterine growth retardation in developing countries. *Eur J Clin Nutr* 1998;52:S5.
2. Colella M, Frérot A, Novais ARB, et al. Neonatal and Long-Term Consequences of Fetal Growth Restriction. *Curr Pediatr Rev* 2018;14:212–218.
3. Engineer N, Kumar S. Perinatal variables and neonatal outcomes in severely growth restricted preterm fetuses. *Acta Obstet Gynecol Scand* 2010;89:1174–1181.
4. Garite TJ, Clark R, Thorp JA. Intrauterine growth restriction increases morbidity and mortality among premature neonates. *Am J Obstet Gynecol. Journal* 2004;191:481–487.

- 1  
2  
3 5. Physical status: the use and interpretation of anthropometry. Report of a WHO Expert  
4  
5 Committee. *World Health Organ Tech Rep Ser* 1995;854:1–452.
- 6  
7  
8 6. Ota E, Ganchimeg T, Morisaki N, et al. WHO Multi-Country Survey on Maternal and  
9  
10 Newborn Health Research Network. Risk factors and adverse perinatal outcomes among  
11  
12 term and preterm infants born small-for-gestational-age: secondary analyses of the WHO  
13  
14 Multi-Country Survey on Maternal and Newborn Health. *PLoS One* 2014;9(8).
- 15  
16  
17 7. Suhag A, Berghella V. Intrauterine growth restriction (IUGR): etiology and diagnosis.  
18  
19 *Current Obstetrics and Gynecology Reports* 2013;2:102–111.
- 20  
21  
22 8. Amiel-Tison C, Cabrol D, Denver R, et al. Fetal adaptation to stress: Part I: Acceleration  
23  
24 of fetal maturation and earlier birth triggered by placental insufficiency in humans. *Early*  
25  
26 *Hum Dev* 2004;78:15–27.
- 27  
28  
29 9. Nobile S, Marchionni P, Carnielli VP. Neonatal outcome of small for gestational age  
30  
31 preterm infants. *Eur J Pediatr* 2017;176:1083–1088.
- 32  
33  
34 10. Amiel-Tison C, Pettigrew AG. Adaptive changes in the developing brain during  
35  
36 intrauterine stress. *BRAIN DEV JPN* 1991;13:67–76.
- 37  
38  
39 11. Arigliani M, Spinelli AM, Liguoro I, et al. Nutrition and Lung Growth. *Nutrients*  
40  
41 2018;10:919.
- 42  
43  
44 12. Bartels DB, Kreienbrock L, Dammann O, et al. Population based study on the outcome of  
45  
46 small for gestational age newborns. *Arch Dis Child Fetal Neonatal Ed* 2005;90:F53–9.
- 47  
48  
49 13. Tsai LY, Chen YL, Tsou KI, et al. Taiwan Premature Infant Developmental  
50  
51 Collaborative Study Group. The impact of small-for-gestational-age on neonatal outcome  
52  
53 among very-low-birth-weight infants. *Pediatr Neonatol* 2015;56:10110–7.
- 54  
55  
56  
57  
58  
59  
60



- 1  
2  
3 14. Fishel Bartal M, Chen HY, Blackwell SC, et al. Neonatal morbidity in late preterm small  
4  
5 for gestational age neonates. *J Matern Fetal Neonatal Med* 2019 23:1–6.  
6  
7
- 8 15. Hasthi UR, Ashwani N, Kumar CS, et al. Morbidity and Mortality Patterns in Small for  
9  
10 Gestational Age versus Appropriate for Gestational Age Preterm Neonates Admitted in  
11  
12 Level II Neonatal Intensive Care Unit: A Observational Study. *Int J Sci Study*  
13  
14 2017;4:133–136.  
15  
16  
17
- 18 16. Simchen MJ, Beiner ME, Strauss-Liviathan N, et al. Neonatal outcome in growth-  
19  
20 restricted versus appropriately grown preterm infants. *Am J Perinatol* 2000;17(04):187–  
21  
22 192.  
23  
24  
25
- 26 17. Giapros V, Drougia A, Krallis N, et al. Morbidity and mortality patterns in small-for-  
27  
28 gestational age infants born preterm. *J Matern Fetal Neonatal Med* 2012;25:153–157.  
29  
30
- 31 18. Qiu X, Lodha A, Shah PS, et al. Canadian Neonatal Network. Neonatal outcomes of  
32  
33 small for gestational age preterm infants in Canada. *Am. J. Perinatol* 2012 ;29:87–94.  
34  
35
- 36 19. Sharma P, McKay K, Rosenkrantz TS, et al. Comparisons of mortality and pre-discharge  
37  
38 respiratory outcomes in small-for-gestational-age and appropriate-for-gestational-age  
39  
40 premature infants. *BMC Pediatr* 2004;4:9.  
41
- 42 20. Malhotra A, Allison BJ, Jenkin G, et al. Neonatal morbidities of fetal growth restriction:  
43  
44 pathophysiology and impact. *Front Endocrinol* 2019;10:55.  
45  
46
- 47 21. Longo S, Bollani L, Decembrino L, et al. Short-term and long-term sequelae in  
48  
49 intrauterine growth retardation (IUGR). *J Matern Fetal Neonatal Med* 2013;26:222–225.  
50  
51  
52  
53  
54  
55  
56  
57  
58  
59  
60

- 1  
2  
3 22. Katz J, Lee AC, Kozuki N, et al. Mortality risk in preterm and small-for-gestational-age  
4 infants in low-income and middle-income countries: a pooled country analysis. *Lancet*  
5 2013;382:417–25.  
6  
7  
8  
9  
10 23. Muhe LM, McClure EM, Mekasha A, et al. A prospective study of causes of illness and  
11 death in preterm infants in Ethiopia: the SIP study protocol. *Reprod. Health* 2018  
12 ;15:116.  
13  
14  
15  
16  
17 24. Muhe LM, McClure EM, Nigussie AK, et al. Major causes of death in preterm infants in  
18 selected hospitals in Ethiopia (SIP): a prospective, cross-sectional, observational study.  
19 *Lancet Glob Health* 2019 ;7:e1130-8.  
20  
21  
22  
23  
24 25. Fenton TR, Kim JH. A systematic review and meta-analysis to revise the Fenton growth  
25 chart for preterm infants. *BMC Pediatr* 2013;13:59.  
26  
27  
28  
29 26. Tyson JE, Kennedy K, Broyles S, et al. The small for gestational age infant: accelerated  
30 or delayed pulmonary maturation? Increased or decreased survival?. *Pediatrics*  
31 1995;95:534–538.  
32  
33  
34  
35 27. Boghossian NS, Geraci M, Edwards EM, et al. Morbidity and mortality in small for  
36 gestational age infants at 22 to 29 weeks' gestation. *Pediatrics* 2018;141:e20172533.  
37  
38  
39  
40 28. Jones KD, Berkley JA, Warner JO. Perinatal nutrition and immunity to infection. *Pediatr*  
41 *Allergy Immunol* 2010;21:564–576.  
42  
43  
44  
45 29. Bozzetti V, Tagliabue PE. Enteral feeding of intrauterine growth restriction preterm  
46 infants: theoretical risks and practical implications. *Pediatr Med Chir* 2017;39:160  
47  
48  
49 30. Sarkar S, Rosenkrantz TS. Neonatal polycythemia and hyperviscosity. *Semin Fetal*  
50 *Neonatal Med* 2008;13:248–255  
51  
52  
53  
54  
55  
56  
57  
58  
59  
60



Supplement: bmjpo-2020-000740.draft_revisions.pdf [file bmjpo-2020-000740.draft_revisions.pdf]
